1 **CHOmpact: a reduced metabolic model of Chinese hamster ovary cells**  
2 **with enhanced interpretability**

3 Ioscani Jiménez del Val<sup>1,\*</sup>, Sarantos Kyriakopoulos<sup>2,‡</sup>, Simone Albrecht<sup>3</sup>, Henning Stockmann<sup>3</sup>,  
4 Pauline M Rudd<sup>3,†</sup>, Karen M Polizzi<sup>4</sup> and Cleo Kontoravdi<sup>4</sup>

5 <sup>1</sup> School of Chemical & Bioprocess Engineering, University College Dublin D04 V1W8, Ireland

6 <sup>2</sup> MS&T, BioMarin Manufacturing Ireland, Cork P43 R298, Ireland

7 <sup>3</sup> NIBRT GlycoScience Group, National Institute for Bioprocessing Research and Training, Dublin  
8 A94 X099, Ireland

9 <sup>4</sup> Department of Chemical Engineering, Imperial College London SW7 2AZ, United Kingdom

10 \*Author to whom correspondence should be addressed.

11 e-mail: [ioscani.jimenezdelval@ucd.ie](mailto:ioscani.jimenezdelval@ucd.ie)

12

13 † Present address: Bioprocessing Technology Institute, Agency for Science, Technology and  
14 Research (A\*STAR) 138668, Singapore

15 ‡ Present address: Process Development, Lonza Group AG, Wisp 3930, Switzerland

16

17

## 18 **Abstract**

19 Metabolic modelling has emerged as a key tool for the characterisation of biopharmaceutical cell  
20 culture processes. Metabolic models have also been instrumental in identifying genetic  
21 engineering targets and developing feeding strategies that optimise the growth and productivity  
22 of Chinese hamster ovary (CHO) cells. Despite their success, metabolic models of CHO cells still  
23 present considerable challenges. Genome scale metabolic models (GeMs) of CHO cells are very  
24 large (>6000 reactions) and are, therefore, difficult to constrain to yield physiologically  
25 consistent flux distributions. The large scale of GeMs also makes interpretation of their outputs  
26 difficult. To address these challenges, we have developed CHOmpact, a reduced metabolic  
27 network that encompasses 101 metabolites linked through 144 reactions. Our compact reaction  
28 network allows us to deploy multi-objective optimisation and ensure that the computed flux  
29 distributions are physiologically consistent. Furthermore, our CHOmpact model delivers  
30 enhanced interpretability of simulation results and has allowed us to identify the mechanisms  
31 governing shifts in the anaplerotic consumption of asparagine and glutamate as well as an  
32 important mechanism of ammonia detoxification within mitochondria. CHOmpact, thus,  
33 addresses key challenges of large-scale metabolic models and, with further development, will  
34 serve as a platform to develop dynamic metabolic models for the control and optimisation of  
35 biopharmaceutical cell culture processes.

## 36 **1. Introduction**

37 Production of recombinant proteins is known to compete with biomass synthesis for externally  
38 provided nutrients. This is particularly true for mammalian cell lines, such as Chinese hamster  
39 ovary (CHO) cells, which are the dominant host for industrial production of therapeutic proteins  
40 (O'Flaherty et al., 2020). Metabolic modelling has become an essential tool for understanding  
41 resource allocation and, coupled with advances in genome editing, designing rational cell  
42 engineering strategies. Publication of the CHO-K1 genome, and the omics analyses this enabled,  
43 laid the foundation for systems-level understanding of this host. This knowledge has been  
44 reconstructed mathematically in a community-curated genome-scale metabolic model (GeM) of

45 the CHO cell termed iCHO1766 (Hefzi et al., 2016). Crucially, the GeM organised knowledge of all  
46 biochemical conversions, transport and exchange reactions to create a large, interlinked network  
47 of metabolites and their associated reactions.

48 The inclusion of gene-protein reaction associations provided a direct link between genes and  
49 metabolic reactions. Since then, significant expansions and improvements to iCHO1766 have  
50 been achieved, such as gap-filling studies that also removed dead-end reactions (Fouladiha et al.,  
51 2021), and the integration of a core protein secretory pathway, iCHO2048, enabling the  
52 computation of energetic costs and machinery demands of each secreted protein (Gutierrez et al.,  
53 2020). Interestingly, iCHO2048 was subsequently used to direct host cell protein knockout  
54 studies which resulted in increased recombinant protein productivity and a cleaner feedstock for  
55 downstream processing steps (Kol et al., 2020), highlighting the power these models hold for  
56 identifying diverse cellular engineering strategies.

57 The solution of GeMs, and any undetermined metabolic model, relies on constraint-based  
58 methods, such as flux balance analysis (FBA), to predict steady-state intracellular flux  
59 distributions (Orth et al., 2010). Although FBA offers the advantage of not requiring detailed  
60 knowledge of enzymatic kinetic parameters, it does not return a unique set of intracellular flux  
61 values. In addition, the larger the metabolic network considered, the more difficult it becomes to  
62 interpret such predictions (Gardner and Boyle, 2017). GeMs therefore require large datasets,  
63 preferably across different omics levels (e.g., metabolomic, transcriptomic) to increase  
64 confidence in results. This is also true for curating GeMs for specific cell lines or systems, raising  
65 the need for extensive experimentation that goes beyond typical analytical measurements  
66 conducted in an industrial setting.

67 Several algorithms have been developed to improve the predictive performance of GeMs, for  
68 example by constraining the amount of carbon able to flowthrough reaction fluxes, based on the  
69 maximum amount carbon uptake by the cell (ccFBA) (Lularevic et al., 2019), taking into account  
70 the selective pressure that exists within cell cultures for fast-growing cell lines with a low enzyme

71 usage (Lewis et al., 2010), or introducing enzyme capacity constraints (Yeo et al., 2020). Despite  
72 these advances, both the accuracy and interpretability of intracellular flux predictions remain  
73 challenging. An additional limitation is the computational difficulty in creating dynamic versions  
74 of GeMs that would reflect the nature of cell culture processes, although recent efforts coupling a  
75 CHO GeM with statistical models have yielded promising results in predicting the time evolution  
76 of extracellular amino acid concentrations (Martínez et al., 2015).

77 In this work, we introduce a reduced-scale metabolic model, CHOmpact, where the reaction  
78 network is based on the work by Carinhas et al. (2013) and has been augmented with a detailed  
79 description the aspartate-malate (Asp-Mal) shuttle, the urea cycle, de novo serine synthesis from  
80 glycolytic intermediates, and nucleotide sugar donor biosynthesis. The resulting network  
81 comprises 101 metabolites and 144 reactions, which due to its compact nature, significantly  
82 enhances the interpretability of simulation results. The reduced scale of the network and  
83 associated FBA problem also allow for more complex, non-linear formulations of the objective  
84 function to be incorporated compared to biomass maximisation that is often employed in FBA of  
85 GeMs. The multi-objective optimisation framework used to solve CHOmpact allows us to solve  
86 across all phases of cell culture and provides insight into the dynamics of cellular metabolism. We  
87 envisage that the advantages presented by CHOmpact will enable the development of dynamic  
88 flux balance models that can serve as digital twins for the control and optimisation of  
89 biopharmaceutical cell culture processes.

## 90 **2. Materials & Methods**

### 91 **2.1. Experimental**

#### 92 **2.1.1. Cell culture**

93 The GS46 GS-CHO cell line producing a humanized anti-Tumour-Associated Glycoprotein (TAG-  
94 72) IgG4 $\kappa$  mAb (cB72.3), a kind gift by Lonza Biologics (Slough, UK), was cultured with three  
95 different amino acid feeds: Feed C, Feed U and Feed U40 (Kyriakopoulos and Kontoravdi, 2014).  
96 Briefly, triplicate cultures for each feeding regime were performed in orbitally shaken (140 rpm)

97 250mL vented conical flasks (Corning, Amsterdam, Netherlands) with a 50mL working volume.  
98 The cultures were performed in a humidified incubator with CO<sub>2</sub> controlled at 8% and  
99 temperature set at 36.5°C. The basal culture medium for all cultures was CD CHO (Life  
100 Technologies, Paisley, UK) supplemented with 25µM methionine sulfoximine (Sigma-Aldrich,  
101 Dorset, UK). All feeding regimes consisted in adding 10% v/v every 48 hours of culture starting  
102 on day 2. The Feed C regime used commercial CD EfficientFeed™ C AGT™ (Invitrogen, UK),  
103 whereas the U and U40 feeds aimed to provide growth-limiting nutrients (glucose and amino  
104 acids) beyond the amounts available in Feed C. The glucose and amino acid concentrations  
105 present in the different feeds is detailed in previous work by Kyriakopoulos and Kontoravdi  
106 (2014).

### 107 **2.1.2. Analytical methods**

108 Viable and dead cell density was determined using the trypan blue dye exclusion method and  
109 light microscopy. mAb titre was determined using the BLitz® system (Pall ForteBio, Portsmouth,  
110 UK). Time profiles for glucose, lactate, and ammonia were generated using the Bioprofile 400  
111 analyser (NOVA Biomedical, Waltham, MA). Residual amino acid profiles were generated using  
112 the PicoTag method (Waters, Hertfordshire, UK) on an Alliance HPLC instrument (Waters,  
113 Hertfordshire, UK). Extracellular pyruvate concentrations were determined with an enzyme  
114 assay kit (Abcam, Cambridge, UK). mAb Fc glycoprofiling was performed with an automated  
115 sample preparation workflow (Stockmann et al., 2013). Briefly, the mAb samples were affinity-  
116 purified from the cell culture supernatant with a 96-well Protein G IgG purification plate (Thermo  
117 Fisher Scientific, Dublin, Ireland). Glycans were released from the mAb through PNGase  
118 (Prozyme, Hayward, California) digestion and labelled with 2-amino benzamide (Ludger, Oxford,  
119 UK). Labelled glycans were separated using ultra-performance hydrophilic interaction  
120 chromatography (UPLC-HILIC) and quantified through fluorescence detection (Stockmann et al.,  
121 2013). Glycans were initially assigned by comparing their Glucose Unit retention times with those  
122 available in the NIBRT GlycoBase 3.2 structural N-glycan library (Campbell et al., 2008). Glycan

123 assignment was confirmed through weak anion exchange chromatography and quadrupole time-  
124 of-flight mass spectrometry on exoglycosidase-digested samples (Albrecht et al., 2014).

### 125 **2.1.3. Dry cell weight measurement**

126 Cells were cultured under the same conditions as described for Feed C, above. Duplicate cultures  
127 were harvested at day 4 and day 10 for dry cell weight (DCW) measurements for cells undergoing  
128 mid-exponential and stationary growth, respectively. Prior to harvest, viable cell density was  
129 determined using the trypan blue dye exclusion method. Immediately after cell counting, 40mL  
130 of the cultures was harvested and centrifuged at 1000g for one minute in pre-weighed 50mL  
131 falcon tubes. The supernatant was then discarded, and the cell pellets were washed once with  
132 40mL 0.9% w/v NaCl (Sigma-Aldrich, Dorset, UK) solution and centrifuged at 1000g for one  
133 minute. The wash was discarded, and the cell pellet was left to dry in a non-humidified incubator  
134 at 37°C until no changes in weight were observed. The tubes were weighed within 1mg accuracy  
135 (ACCULAB, Sartorius, Surrey, UK).

### 136 **2.1.4. Data processing and analysis**

137 The cell-specific rates for nutrient consumption and metabolite/product secretion,  $q_i(t_n)$ , were  
138 calculated by performing linear regressions to obtain the slopes in Eq. 1 (Sauer et al., 2000),  
139 where  $N_{i,cons}(t_n)$  is the consumed/produced amount of component  $i$  (in units of  $nmol_i$  or  $mg_{mAb}$ )  
140 up to time  $t_n$  and  $IVC(t_n)$  is the integral of viable cells up to time  $t_n$  in units of  $10^6$  cells h.

$$N_{i,cons}(t_n) = q_i(t_n)IVC(t_n) \quad \text{Eq. 1}$$

$$N_{i,cons}(t_n) = [C]_{i,res}(t_n)Vol(t_n) - \sum_{j=1}^n [C]_{i,feed}Vol_{feed}(t_j) \quad \text{Eq. 2}$$

$$IVC(t_n) = \sum_{j=1}^n \frac{[X_v](t_j)Vol(t_j) + [X_v](t_{j-1})Vol(t_{j-1})}{2} (t_j - t_{j-1}) \quad \text{Eq. 3}$$

141  $N_{i,cons}(t_n)$  and  $IVC(t_n)$  were computed using Eq. 2 and Eq. 3, respectively. In Eq. 2,  $[C]_{i,res}(t_n)$  is  
142 the residual concentration of component  $i$  at time  $t_n$ ,  $[C]_{i,feed}$  is the concentration of component

143  $i$  in the feed and  $Vol_{fed}(t_j)$  is the feed volume added at time  $j$ . In Eq. 3,  $[X_v](t_j)$  is cell density at  
144 time  $t_j$  and  $Vol(t_j)$  is liquid volume in the culture flask at time  $t_j$ .

145 The linear regressions for the determination of cell specific uptake rates were computed using  
146 the LINEST function in Microsoft Excel. Confidence intervals for the obtained  $q_i(t_n)$  values were  
147 computed with the least square residuals and a t-value for  $p = 0.05$ . Data analysis identified six  
148 distinct intervals with constant uptake/secretion rates: early exponential, mid-exponential, late  
149 exponential, early stationary, and stationary. Raw cell culture data is presented in Supplementary  
150 Figure 1, and the processed data, along with the identified intervals are presented in  
151 Supplementary Figure 2.

152 The amount of mAb glycoform secreted across different intervals was calculated using Eq. 4,  
153 where  $f_k$  represents the fraction of mAb glycoform  $k$  secreted during the time interval  
154  $(t_n - t_{n-1})$ ,  $[mAb]_i(t_n)$  is the concentration of mAb glycoform  $k$  present at time  $t_n$  and  $[mAb](t_n)$   
155 is the total mAb titre at time  $t_n$  (del Val et al., 2016a; Fan et al., 2015).

$$f_k = \frac{[mAb]_k(t_n) - [mAb]_k(t_{n-1})}{[mAb](t_n) - [mAb](t_{n-1})} \quad \text{Eq. 4}$$

## 156 **2.2. Flux balance model development**

157 Our flux balance model (Figure 1) is based on previous work for GS-CHO cells (Carinhas et al.,  
158 2013), which has been expanded to include the aspartate-malate (Asp-Mal) shuttle (Mulukutla et  
159 al., 2012; Nolan and Lee, 2011), the urea cycle (Zamorano et al., 2010), *de novo* serine synthesis  
160 from glycolytic intermediates, and ATP synthesis via oxidative phosphorylation. The pathway for  
161 nucleotide sugar donor biosynthesis (Kremkow and Lee, 2018) has also been included.

162 Manual curation of our FBA model was performed using the KEGG database (Kanehisa et al., 2017;  
163 Kanehisa et al., 2019) and the reference CHO-K1 and *Cricetulus griseus* genome annotations  
164 (Kremkow et al., 2015; Lewis et al., 2013; Rupp et al., 2018). The resulting model comprises 101  
165 metabolites linked through 299 reactions (Supplementary Table 1). Supplementary Table 1 also

166 provides links for all enzymatic reactions to KEGG (Kanehisa et al., 2017; Kanehisa et al., 2019)  
 167 as well as to reference sequences in the NCBI database (O'Leary et al., 2016).

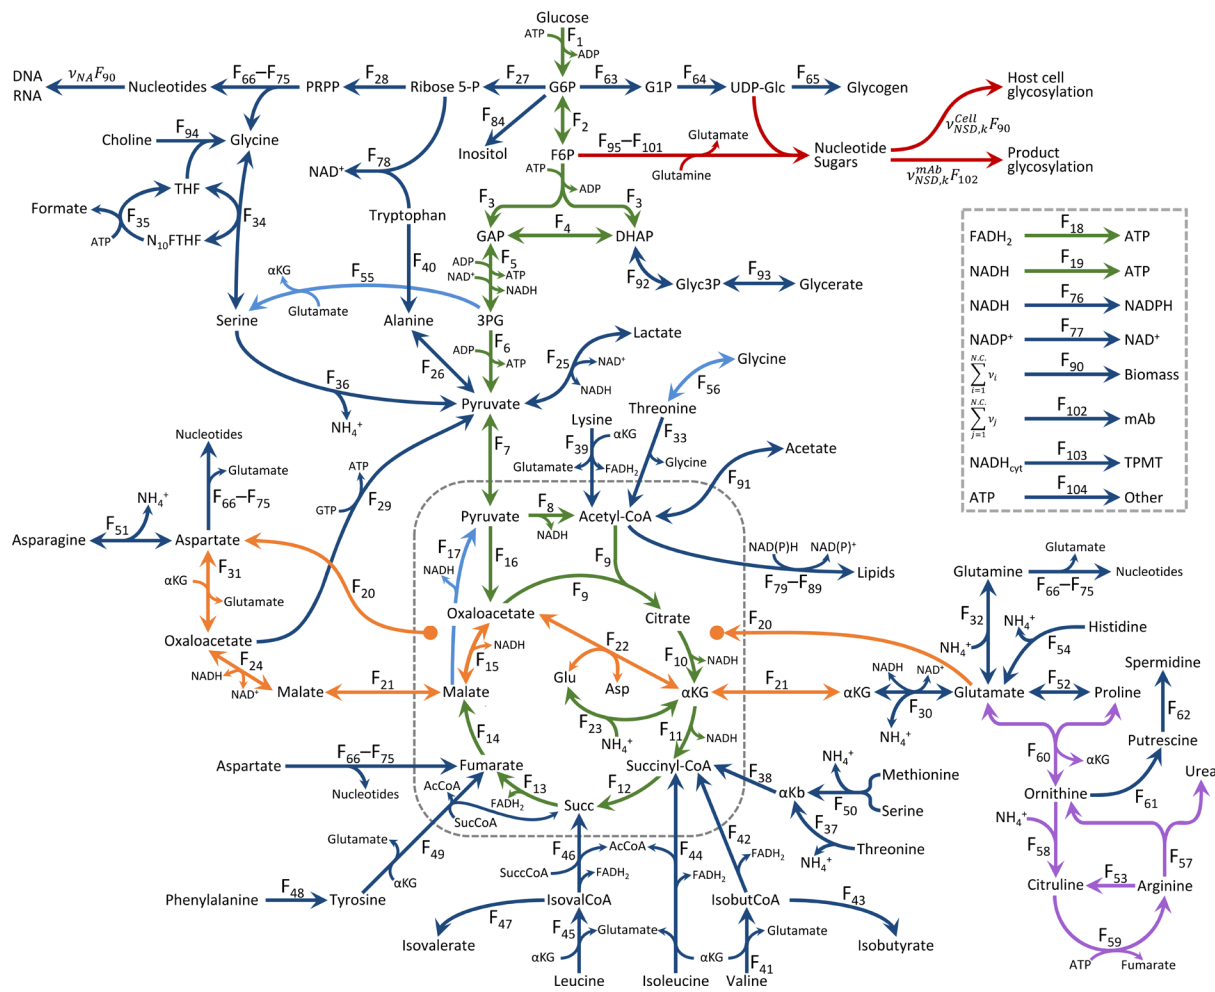

Figure 1. FBA reaction network

168  
 169  
 170 The present FBA model considers 101 species linked through 144 fluxes. Different colours indicate  
 171 particular metabolic pathways: glycolysis, TCA and oxidative phosphorylation (Green), nucleotide  
 172 sugar donor metabolism (Red), aspartate-malate shuttle (Orange), urea cycle (Purple), amino acid  
 173 and nucleotide metabolism (Dark Blue) and cycle fluxes that must be constrained and/or estimated  
 174 during optimisation (Light Blue).

175 Sequential reactions throughout the metabolic pathways were combined into single reaction  
 176 fluxes to reduce degrees of freedom within the model (Nolan and Lee, 2011). Overall, the resulting  
 177 metabolic model considers material balances for 101 species, one additional equation that  
 178 defines the consumption of ATP towards active amino acid transport and 144 fluxes (Figure 1



179 and Supplementary File, Section 2), yielding 42 degrees of freedom. The full stoichiometric matrix  
180 underlying our model is presented in Supplementary Table 2.

### 181 **2.2.1. Stoichiometric equations for biomass and product**

182 Calculations for the biomass stoichiometric coefficients are presented in Supplementary Table 3.  
183 Based on experimental measurements, the biomass stoichiometric equation considers a dry cell  
184 weight of 219 pg/cell for exponentially growing cells and 311 pg/cell for cells in stationary phase.  
185 The mass composition of GS-CHO cells is based on Sheikh et al. (2005) and Hefzi et al. (2016) and  
186 assumes 74.2% protein, 11.1% lipids, 5.0% RNA, 1.4% DNA, 0.4% glycogen, 0.2% N-glycans, 0.3%  
187 O-glycans, 2.9% other intracellular components (e.g. MTHF, NAD(P)H, AcCoA) and 4.5% non-  
188 balanced components (ash).

189 The individual amino acid content of protein was computed from CHO cell proteomic data  
190 (Baycin-Hizal et al., 2012), as reported previously (del Val et al., 2016b). The glycan content of  
191 biomass, which has been included by using the biomass NSD stoichiometric coefficients for  
192 cellular protein N- and O-linked glycosylation as well as glycolipid glycosylation (del Val et al.,  
193 2016b).

194 The stoichiometric equation for the cB72.3 product, a humanised IgG4 $\kappa$  mAb, was computed  
195 based on the amino acid sequences for the human IgG4 Fc (Heilig et al., 2003), the constant  
196 fragment of a human kappa light chain (Brady et al., 1991; Xiang et al., 1999), as well as the  
197 variable heavy and light chain fragments for the cB72.3 mAb (Xiang et al., 1999). The sequences  
198 and calculations for the mAb amino acid stoichiometric coefficients are presented in  
199 Supplementary Table 4.

200 mAb glycoprofiling at three culture timepoints (192h, 240h, and 288h) allowed us to calculate  
201 stoichiometric coefficients for NSD consumption towards mAb glycosylation across three culture  
202 intervals: 0 to 192 hours, 192 to 240 hours, and 240 to 288 hours. These calculations were made  
203 with Eq. 4, and the obtained stoichiometric values are presented in Supplementary Table 5.

## 204 **2.2.2. FBA solution: multi-objective optimisation**

205 As with most FBA models, no intracellular accumulation of species has been assumed in the  
206 material balances generated from our stoichiometric matrix, leading to a problem of the form:

$$S \times F = 0 \quad \text{Eq. 5}$$

207 Where  $S$  is the stoichiometric matrix defined in Supplementary Table 2 and  $F$  is the vector of  
208 unknown fluxes. Because the model contains more unknown fluxes (144) than equations (102),  
209 it must be solved using constraint-based optimisation strategies that have been outlined  
210 elsewhere (Banga, 2008).

211 Two constraint-based optimisation strategies have been used to solve our FBA. The first is typical  
212 in that it maximises the rate of biomass synthesis while maintaining the transport flux for all  
213 nutrients, metabolites, and product set to their experimentally determined values. Reaction  
214 reversibility constraints, based on enzyme data available in the KEGG (Kanehisa et al., 2017;  
215 Kanehisa et al., 2019) and BRENDA (Jeske et al., 2019) databases, were included and are indicated  
216 in Supplementary Tables 1 and 2.

217 The multi-objective optimisation strategy proposed herein simultaneously maximises the fluxes  
218 where ATP is synthesised while minimising the sum of squared intracellular fluxes. This objective  
219 function represents maximum energetic efficiency by the cells (Schuetz et al., 2007) and was used  
220 to ensure consistent directionality of central carbon metabolism fluxes. Alongside maximising the  
221 energetic efficiency of the cells, the squared difference between measured and computed fluxes  
222 was minimised to ensure consistency between our flux model results and our experimental  
223 measurements. In order to avoid flux  $F_{15}$  being bypassed by  $F_{17}$ , the  $F_{17}/F_{14}$  ratio was constrained  
224 to values within the  $[0, 1]$  interval and minimised. Finally, the sum of non-measured by-product  
225 secretion fluxes was also minimised as part of this multi-objective optimisation strategy. As with  
226 the traditional optimisation strategy, flux reversibility constraints were included within our  
227 multi-objective optimisation strategy.

228 An additional constraint was included for the maximum allowable fluxes along the aspartate-  
229 malate (Asp-Mal) shuttle. Flux through the Asp-Mal shuttle was constrained by limiting the  
230 maximum amount of glutamate transported into the mitochondrial lumen ( $F_{20}$ ) to the flux of  
231 glutamate internalised by the cells or produced through reactions independent of the Asp-Mal  
232 shuttle.  $F_{20}$  was constrained because this antiport transport flux is the rate-limiting step of the  
233 Asp-Mal shuttle (LaNoue et al., 1974; LaNoue and Tischler, 1974).

234 Importantly, a constraint for Asp-Mal fluxes is required because the sum of all reactions in the  
235 shuttle result, exclusively, in net transport of cytosolic NADH into the mitochondrial lumen (see  
236 Supplementary File). Thus, the fluxes through the reactions underlying the Asp-Mal shuttle can  
237 take any value as long as the balances for cytosolic and mitochondrial NADH are met (i.e., all other  
238 fluxes cancel each other out). This is likely to be the cause of what may be considered high (and  
239 possibly inconsistent) Asp-Mal shuttle fluxes with values that are comparable with glucose  
240 uptake fluxes (Mulukutla et al., 2012; Nolan and Lee, 2011). Avoiding these potential  
241 inconsistencies led us to include this Asp-Mal constraint within our FBA solution strategy.

242 Our multi-objective optimisation strategy also constrains  $F_{16}$  to be 1% of the glucose uptake flux  
243 ( $F_{105}$ ), as previously determined for CHO cells undergoing both exponential and stationary  
244 growth (Ahn and Antoniewicz, 2013). Both optimisation strategies are outlined in Table 1, where  
245  $F_j$  are all intracellular fluxes,  $ATP_{synth.}$  is the squared sum of ATP synthesis reaction fluxes,  $SSE$   
246 is the sum of square errors between the measured and computed transport fluxes,  $F_{k,BP}$  are the  
247 fluxes of by-product synthesis reactions,  $LB_i$  and  $UB_i$  are lower and upper bounds for flux values  
248 (a reaction is irreversible when  $LB_i = 0$ ),  $C_{Asp/Mal}$  is the Asp-Mal shuttle constraint,  $\varepsilon$  represents  
249 a small threshold value,  $F_m^{Comp.}$  and  $F_m^{Meas.}$  are the computed and measured transport fluxes,  
250 respectively,  $F_g$  are the fluxes of reactions where Glu is produced or consumed (excluding Asp-  
251 Mal shuttle reactions), and  $v_g$  is the stoichiometric coefficient for these Glu synthesis reactions.

252 **Table 1. Optimisation strategies for flux balance model solution**

| BM maximisation                                                                                                                                                                                                                           | Multi-objective optimisation                                                                                                                                                                                                                                                                                                                                                                                                                                                                                                                                                                                                                                                                                      |
|-------------------------------------------------------------------------------------------------------------------------------------------------------------------------------------------------------------------------------------------|-------------------------------------------------------------------------------------------------------------------------------------------------------------------------------------------------------------------------------------------------------------------------------------------------------------------------------------------------------------------------------------------------------------------------------------------------------------------------------------------------------------------------------------------------------------------------------------------------------------------------------------------------------------------------------------------------------------------|
| $\begin{aligned} & \text{MAX}(F_{142}) \\ & \text{Subject to:} \\ & \left\{ \begin{array}{l} LB_i \leq F_i \leq UB_i \\ \left[ 100 \left( \frac{F_{143}}{q_p} - 1 \right) \right]^2 \leq \varepsilon_p \end{array} \right. \end{aligned}$ | $\begin{aligned} & \text{MIN} \left( \frac{\sum_{j=1}^{104} F_j^2}{ATP_{synth.}} + SSE + \sum_{k=1}^{14} F_{k,BP}^2 + \frac{F_{17}}{F_{14}} \right) \\ & \text{Subject to:} \\ & \left\{ \begin{array}{l} LB_i \leq F_i \leq UB_i \\ 0 \leq \frac{F_{17}}{F_{14}} \leq 1 \\ C_{Asp/Mal} \leq \varepsilon_{Asp/Mal} \\ \left[ 100 \left( \frac{F_{16}}{F_{105}} - 0.01 \right) \right]^2 \leq \varepsilon_{16/105} \end{array} \right. \\ & \text{Where:} \\ & ATP_{synth.} = (F_5)^2 + (F_6)^2 + (1.5F_{18})^2 + (2.5F_{19})^2 \\ & SSE = \sum_{k=1}^{38} \left[ 100 \left( \frac{F_m^{Comp.}}{F_m^{Meas.}} - 1 \right) \right]^2 \\ & C_{Asp/Mal} = \left( \sum_g^{18} v_g F_g - F_{20} \right)^2 \end{aligned}$ |

253

254 The biomass maximisation strategy was used to compare performance of our reduced FBA model  
 255 with the iCHO1766 GeM (Hefzi et al., 2016) while the energetic efficiency maximisation strategy  
 256 was used for all other simulations presented herein. All optimisations were performed using the  
 257 nonlinear programming sequential quadratic programming (NLPSQP) solver built into gPROMS  
 258 ModelBuilder v6.0.2 (Process Systems Enterprise) on a standard desktop workstation (AMD  
 259 Ryzen 2700x @ 4GHz and 16GB RAM).

### 260 3. Results and discussion

#### 261 3.1. The reduced reaction network performs comparably with the iCHO1766 GeM

262 The maximum specific growth rates ( $\mu_{g,max}$ ) of multiple CHO cell lines cultured under different  
 263 conditions were calculated through the biomass synthesis rate maximisation strategy. The

264 required inputs for this solution strategy, namely the nutrient, metabolite, and product transport  
265 fluxes, were obtained from previously published data (Carinhas et al., 2013; Martínez et al., 2015;  
266 Selvarasu et al., 2012), as summarized in the supplementary information of Hefzi et al. (2016).  
267 In order to assess whether our assumed biomass composition and reduced reaction network  
268 performs comparably with a large-scale model for CHO cell metabolism, Figure 2 compares our  
269 predicted  $\mu_{g,max}$  values with those obtained using the iCHO1766 GeM (Hefzi et al., 2016) and the  
270 corresponding experimental data.

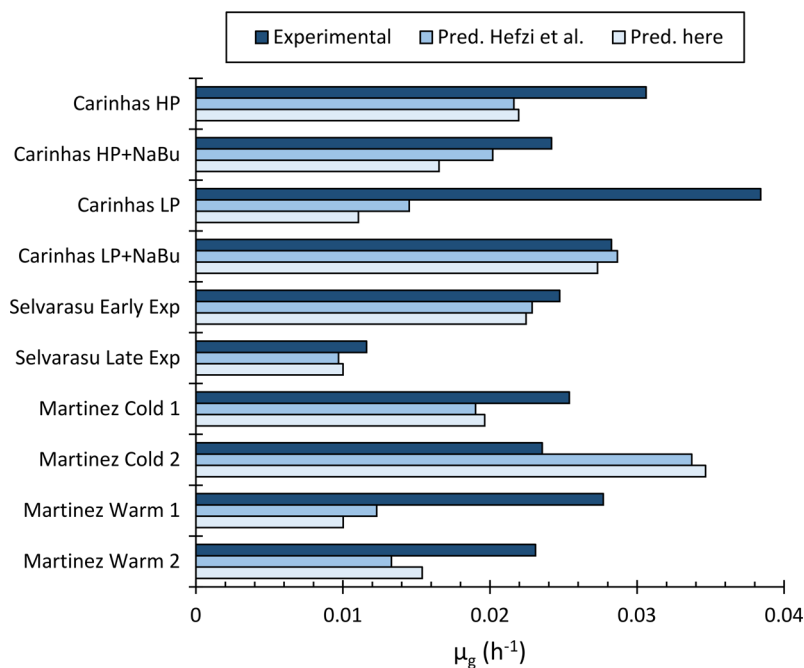

271  
272 **Figure 2. Comparison of experimentally determined and predicted maximum specific growth rates**  
273 **( $\mu_{g,max}$ ) for different CHO cell lines and culture conditions. The dark blue bars present the**  
274 **experimentally determined  $\mu_{g,max}$  values reported by Carinhas et al. (2013), Martínez et al. (2015),**  
275 **and Selvarasu et al. (2012). The medium blue bars present  $\mu_{g,max}$  predictions reported by Hefzi et**  
276 **al. (2016) and the light blue bars show the  $\mu_{g,max}$  values predicted with CHOmpact.**

277 Figure 2 shows that our model accurately predicts (within 15% deviation) the experimental data  
278 for the Low Producing CHO cell line cultured with sodium butyrate (LP+NaBu) from Carinhas et  
279 al. (2013) as well as the early and late exponential growth phases reported by Selvarasu et al.  
280 (2012). Our model underpredicts the growth rate reported for the High Producing CHO cell line

281 cultured in absence and presence of NaBu (HP and HP+NaBu, respectively) (Carinhas et al., 2013)  
282 as well as CHO cells cultured under normal and mild hypothermic conditions (Warm 1, Warm 2,  
283 and Cold 1, respectively) (Martínez et al., 2015). Our model overpredicts the biomass synthesis  
284 rate of the second hypothermic dataset (Cold 2) reported by Martínez et al. (2015).

285  $\mu_{g,max}$  optimisations were performed using the biomass composition assumed by Hefzi et al.  
286 (2016) in order to discern whether the deviation in predictive capabilities of our model were  
287 caused by our assumed biomass composition. These optimisations yield overall average  
288 deviations from the experimental data that are indistinguishable from those obtained with our  
289 assumed biomass composition (data not shown). These results are expected, especially when  
290 considering that the minor differences between our assumed biomass composition and the one  
291 used in the GEM involve prototrophic amino acids (Ala, Gln, Gly) (Supplementary Figure 4).

292 Although the deviations are considerable in some cases, our predictions are similar to those  
293 reported for the CHO GeM (Hefzi et al., 2016), and are better for Carinhas HP, Selvarasu Late Exp,  
294 Martinez Cold 1, and Martinez Warm 2. Overall, the GeM has an average percent deviation across  
295 the ten experimental  $\mu_{g,max}$  values of 30%, whereas our model has an average deviation of 32.5%.  
296 When considering that our model includes only 144 reactions when compared to 6,663 in the  
297 GeM, a 2.5% reduction in predictive capability is acceptable, especially considering gains in model  
298 output consistency and interpretability (to be discussed in subsequent sections) as well as  
299 reductions in computational expense, when using non-linear, multi-objective optimisation  
300 strategies for solution.

### 301 **3.1.1. CHOmpact identifies the source of $\mu_g$ prediction inaccuracies**

302 An advantage of our proposed multi-objective optimisation strategy is that it enables the  
303 identification of nutrient uptake rates that lead to shortfalls in calculated specific growth rates  
304 when compared with the experimental values. This is achieved by constraining the maximum  
305 allowable value for the percent error of biomass growth rate and specific productivity to low  
306 values ( $5 \times 10^{-6}$ ) while fixing the uptake/secretion flux values of Glc, Lac,  $\text{NH}_4^+$ , Pyr, Ala, Asn, Asp,

307 Glu, Gly to the experimentally determined flux values. The upper bounds for the uptake fluxes of  
 308 the remaining (mainly auxotrophic) amino acids are relaxed and obtained via constrained  
 309 optimisation where the SSE is minimised. This strategy ensures that the optimal solution matches  
 310 the experimental growth rate and specific productivity while finding the combination of amino  
 311 acid uptake fluxes that minimises deviations from the experimental uptake rates.

312 The above strategy yields the results presented in Table 2, where the percent increases in specific  
 313 uptake rates required for matching the experimentally determined  $\mu_g$  and  $q_p$  are shown  
 314 (positive/red values denote percent increase in uptake fluxes required to match  $\mu_g$  and  $q_p$ ). Table  
 315 2 shows that for Car LP (NaBu), Selv (Early), Selv (Late), and Mart (Cold2), small or no increases  
 316 in amino acid uptake rates are required to match  $\mu_g$  and  $q_p$ . This is expected, considering the  
 317 results of Figure 2, where the predicted values for  $\mu_g$  are matched or exceeded for these datasets.

318 **Table 2. Percent increases in amino acid uptake rates required to match  $\mu_g$  and  $q_p$ . The intensity of**  
 319 **the colours (from green = 0% to red) corresponds to magnitudes across all datasets.**

|           | Car HP | Car HP (NaBu) | Car LP | Car LP (NaBu) | Selv (Early) | Selv (Late) | Mart (Cold1) | Mart (Cold2) | Mart (Warm1) | Mart (Warm2) |
|-----------|--------|---------------|--------|---------------|--------------|-------------|--------------|--------------|--------------|--------------|
| $\mu_g$   | 0.0%   | 0.0%          | 0.0%   | 0.0%          | 0.0%         | 0.0%        | 0.0%         | 0.0%         | 0.0%         | 0.0%         |
| $q_p$     | 0.0%   | 0.0%          | 0.0%   | 0.0%          | 0.0%         | 0.0%        | 0.0%         | 0.0%         | 0.0%         | 0.0%         |
| $q_{Glc}$ | 0.0%   | 0.0%          | 0.0%   | 0.0%          | 0.0%         | 0.0%        | 0.0%         | 0.0%         | 0.0%         | 0.0%         |
| $q_{Lac}$ | 0.0%   | 0.0%          | 0.0%   | 0.0%          | 0.0%         | 0.0%        | 0.0%         | 0.0%         | 0.0%         | 0.0%         |
| $q_{NH4}$ | 0.0%   | 0.0%          | 0.0%   | 0.0%          | 0.0%         | 0.0%        | 0.0%         | 0.0%         | 0.0%         | 0.0%         |
| $q_{Pyr}$ | 0.0%   | 0.0%          | 0.0%   | 0.0%          | 0.0%         | 0.0%        | 0.0%         | 0.0%         | 0.0%         | 0.0%         |
| $q_{Ala}$ | 0.0%   | 0.0%          | 0.0%   | 0.0%          | 0.0%         | 0.0%        | 0.0%         | 0.0%         | 0.0%         | 0.0%         |
| $q_{Asn}$ | 0.0%   | 0.0%          | 0.0%   | 0.0%          | 0.0%         | 0.0%        | 0.0%         | 0.0%         | 0.0%         | 0.0%         |
| $q_{Asp}$ | 0.0%   | 0.0%          | 0.0%   | 0.0%          | 0.0%         | 0.0%        | 0.0%         | 0.0%         | 0.0%         | 0.0%         |
| $q_{Gln}$ | 0.0%   | 0.0%          | 0.0%   | 0.0%          | 0.0%         | 0.0%        | 0.0%         | 0.0%         | 48.7%        | 35.0%        |
| $q_{Glu}$ | 0.0%   | 0.0%          | 0.0%   | 0.0%          | 0.0%         | 0.0%        | 0.0%         | 0.0%         | 0.0%         | 0.0%         |
| $q_{Gly}$ | 0.0%   | 0.0%          | 0.0%   | 0.0%          | 0.0%         | 0.0%        | 0.0%         | 0.0%         | 0.0%         | 0.0%         |
| $q_{Arg}$ | 0.2%   | 0.0%          | 8.4%   | -0.1%         | -0.3%        | 0.0%        | 0.8%         | -0.4%        | 17.4%        | 18.6%        |
| $q_{His}$ | 0.5%   | 25.0%         | 33.9%  | 0.0%          | 0.0%         | 2.6%        | 1.8%         | 0.0%         | 22.7%        | 6.8%         |
| $q_{Ile}$ | 0.9%   | 0.0%          | 20.2%  | 0.0%          | 0.0%         | 0.0%        | 2.5%         | 0.0%         | 9.5%         | 13.2%        |
| $q_{Leu}$ | 13.0%  | 1.4%          | 29.8%  | 0.0%          | 0.4%         | 9.0%        | 5.7%         | 0.1%         | 18.6%        | 16.2%        |
| $q_{Lys}$ | 24.7%  | 0.1%          | 38.8%  | 0.0%          | 0.0%         | 4.0%        | 22.0%        | 0.0%         | 41.0%        | 18.7%        |
| $q_{Met}$ | 9.4%   | 0.0%          | 23.4%  | 0.0%          | 0.0%         | 0.0%        | 0.0%         | 0.0%         | 13.8%        | 0.1%         |
| $q_{Phe}$ | 25.4%  | 0.0%          | 47.4%  | 3.3%          | 8.4%         | 10.1%       | 16.4%        | 0.1%         | 33.2%        | 8.1%         |
| $q_{Pro}$ | 0.9%   | 0.0%          | 21.9%  | 0.0%          | 0.0%         | 0.0%        | 2.0%         | 0.0%         | 2.4%         | 7.3%         |
| $q_{Ser}$ | 3.3%   | 0.1%          | 41.1%  | 0.1%          | 0.0%         | 0.0%        | 9.1%         | 0.2%         | 25.0%        | 33.4%        |
| $q_{Thr}$ | 3.8%   | 0.0%          | 15.0%  | 0.0%          | 0.5%         | 0.0%        | 13.9%        | 5.3%         | 9.4%         | 13.2%        |
| $q_{Trp}$ | 0.2%   | 0.0%          | 6.2%   | 0.0%          | 0.0%         | 0.0%        | 0.5%         | 0.0%         | 20.0%        | 2.2%         |
| $q_{Tyr}$ | 21.8%  | 0.0%          | 41.7%  | 2.6%          | 0.0%         | 0.0%        | 5.5%         | 0.1%         | 28.3%        | 5.3%         |
| $q_{Val}$ | 12.5%  | 5.1%          | 34.1%  | 0.0%          | 0.6%         | 6.8%        | 3.6%         | 0.0%         | 17.1%        | 14.2%        |

320 Across all other datasets, substantial increases in amino acid uptake rates are required to match  
321 the experimental values for  $\mu_g$  and  $q_p$ . Except for both Martínez et al. (2015) Warm datasets, the  
322 uptake rate for amino acids which limit growth are auxotrophic (outlined in the bottom half of  
323 Table 2) and, in all but one case (Car HP NaBu), multiple auxotrophic amino acids limit the growth  
324 rate predictions. Particularly sharp deviations across multiple amino acids are observed for the  
325 Car LP and both Mart Warm datasets. In addition, both Mart Warm datasets are the only ones that  
326 require increased uptake of Gln.

327 Interestingly, when the upper bound for the Gln uptake flux is completely relaxed for the Mart  
328 Warm 2 dataset, a 74.5% increase in uptake for this nutrient is obtained, and only Lys (required  
329 14.2% increase) and Thr (required 6.7% increase) are observed to limit growth (data not shown).  
330 This result indicates that, for this dataset, the uptake rates of the remaining amino acids do not  
331 stoichiometrically limit biomass synthesis. Rather, the limitation in growth is associated with the  
332 relatively low uptake rate of Ser which, according to our model, can be overcome by Glu-  
333 associated biosynthesis via  $F_{55}$ . It is this additional intracellular Glu demand which pushes the  
334 uptake rates for Gln, Ile, Leu, Lys, and Val to higher values (Glu can be produced from these amino  
335 acids via reactions  $F_{32}$ ,  $F_{44}$ ,  $F_{45}$ ,  $F_{39}$ , and  $F_{41}$ , respectively).

336 Full relaxation of the Gln uptake upper bound leads to a 65.9% increase and completely curbs the  
337 excess requirements for Ser. However, the excess demand for all remaining auxotrophic amino  
338 acids (His, Ile, Leu, Lys, Met, Phe, Trp, Tyr, and Val) is unchanged, indicating that for the Mart Cold  
339 1 dataset, the uptake rates of auxotrophic amino acids stoichiometrically limit growth.

340 It is key to mention that underestimations for  $\mu_g$  arise from two possible sources (or a  
341 combination thereof): (i) either the assumed stoichiometric coefficients for auxotrophic amino  
342 acids in biomass are too high or (ii) the measured uptake rates for auxotrophic amino acids is  
343 underestimated. Beyond typical experimental variability, the measured uptake rates are unlikely  
344 to have such drastic effects on the predicted growth (errors in uptake rate measurements above  
345 30% are unlikely – see Table 2). Therefore, uncertainty associated with biomass composition is



346 the more likely culprit, especially when considering that it has seldom been measured for flux  
347 balance studies.

348 Questions surrounding CHO cell biomass composition have been recently addressed, where an  
349 average protein content (w/w) of  $55.7\% \pm 5.5\%$  and a dry cell weight (DCW) of  $262.1 \pm 28.2$   
350 pg/cell is reported for multiple CHO cell lines cultured under different conditions (Szelióva et al.,  
351 2020). When comparing these values with the 350pg/cell and 74.2% w/w protein assumed (not  
352 measured) for the datasets with the largest shortfalls in predicted  $\mu_g$  (Martinez Warm), a

353 maximum reduction of  $\left(\frac{55.7\% - 5.5\%}{74.2\%}\right) \left(\frac{262.1 \frac{pg}{cell} - 28.2 \frac{pg}{cell}}{350 \frac{pg}{cell}}\right) = 45.3\%$  in amino acid demand towards

354 biomass synthesis can be computed. Such a reduction would compensate for the calculated  
355 shortfalls in auxotrophic amino acid uptake rates presented in Table 2 and, therefore, enhance  
356 the predictive capability of both our model and Hefzi's GeM.

357 Although detailed data for CHO cell biomass composition is now available (Szelióva et al., 2020),  
358 the values of 350pg/cell and 74.2% w/w protein were used for the results presented in Figure 2  
359 and Table 2 in order to pinpoint how model predictive capability is impacted by our reduced  
360 reaction network when compared with the full GeM. In addition, Supplementary Figure 4  
361 provides a comparison between the stoichiometric coefficients of amino acids in biomass  
362 assumed here with the experimentally determined ones from Szelióva et al. (2020). Despite  
363 considerable differences in DCW (219 pg/cell for exponential growth vs.  $262.1 \pm 28.2$  pg/cell)  
364 and protein content (74.2% vs.  $55.7\% \pm 5.5\%$ ), the stoichiometric coefficients result in quite  
365 comparable values. Therefore, we have elected to retain our originally assumed biomass  
366 composition for all subsequent calculations presented herein.

367 The above results highlight the importance of using accurate measurements for DCW and  
368 biomass composition in flux balance modelling. However, it is also important to mention that that  
369 biomass composition will impact model predictive capabilities only when auxotrophic  
370 components of biomass and product stoichiometrically limit growth and will be less of a factor

371 when nutrient uptake rates exceed stoichiometric requirements. The latter case is observed for  
372 the Martinez Cold 2 dataset, where both the GeM and our model considerably over-predict  $\mu_g$ .  
373 Several strategies have been developed to address situations where cell growth is not limited by  
374 stoichiometry. On one hand, exploring different metabolic objectives, such as maximising  
375 energetic efficiency, minimising redox stress or the uptake of essential nutrients (Chen et al.,  
376 2019; Feist and Palsson, 2010; Schuetz et al., 2007) can improve the predictive capability of flux  
377 models where nutrient uptake rates stoichiometrically exceed demand for growth and product  
378 synthesis. On another hand, strategies to further constrain the allowable values of fluxes through  
379 the reaction network have also been explored. For example, Lularevic et al. (2019) provide  
380 additional constraints using carbon balancing and Yeo et al. (2020) have developed an interesting  
381 framework whereby the fluxes through the reaction network are constrained based on the  
382 maximum rates and expression levels of the corresponding metabolic enzymes.

### 383 **3.2. CHOmpact facilitates easier interpretation of flux distributions.**

384 Our reduced reaction network and multi-objective optimisation strategy has two key advantages  
385 over full genome-scale models and the traditional growth rate maximisation objective function  
386 used to solve them. Firstly, our multi-objective optimisation strategy enables us to calculate flux  
387 distributions across different growth phases (beyond exponential growth) and, therefore,  
388 provides enhanced insight into flux distribution dynamics. In addition, the use of multiple  
389 objectives further constrains the solution space to achieve flux distributions that are biologically  
390 consistent. Secondly, our reduced reaction network simplifies model output interpretation and  
391 allows us to better relate the obtained flux distributions with cellular physiology.

#### 392 **3.2.1. Flux distribution dynamics**

393 Figure 3 presents central carbon metabolism and Asp-Mal shuttle fluxes obtained with our  
394 reduced reaction network and multi-objective optimisation framework, where the flux maps  
395 correspond to three different feed compositions (Feed C, Feed U, and Feed U40) across the five  
396 phases of culture identified Supplementary Figure 2.

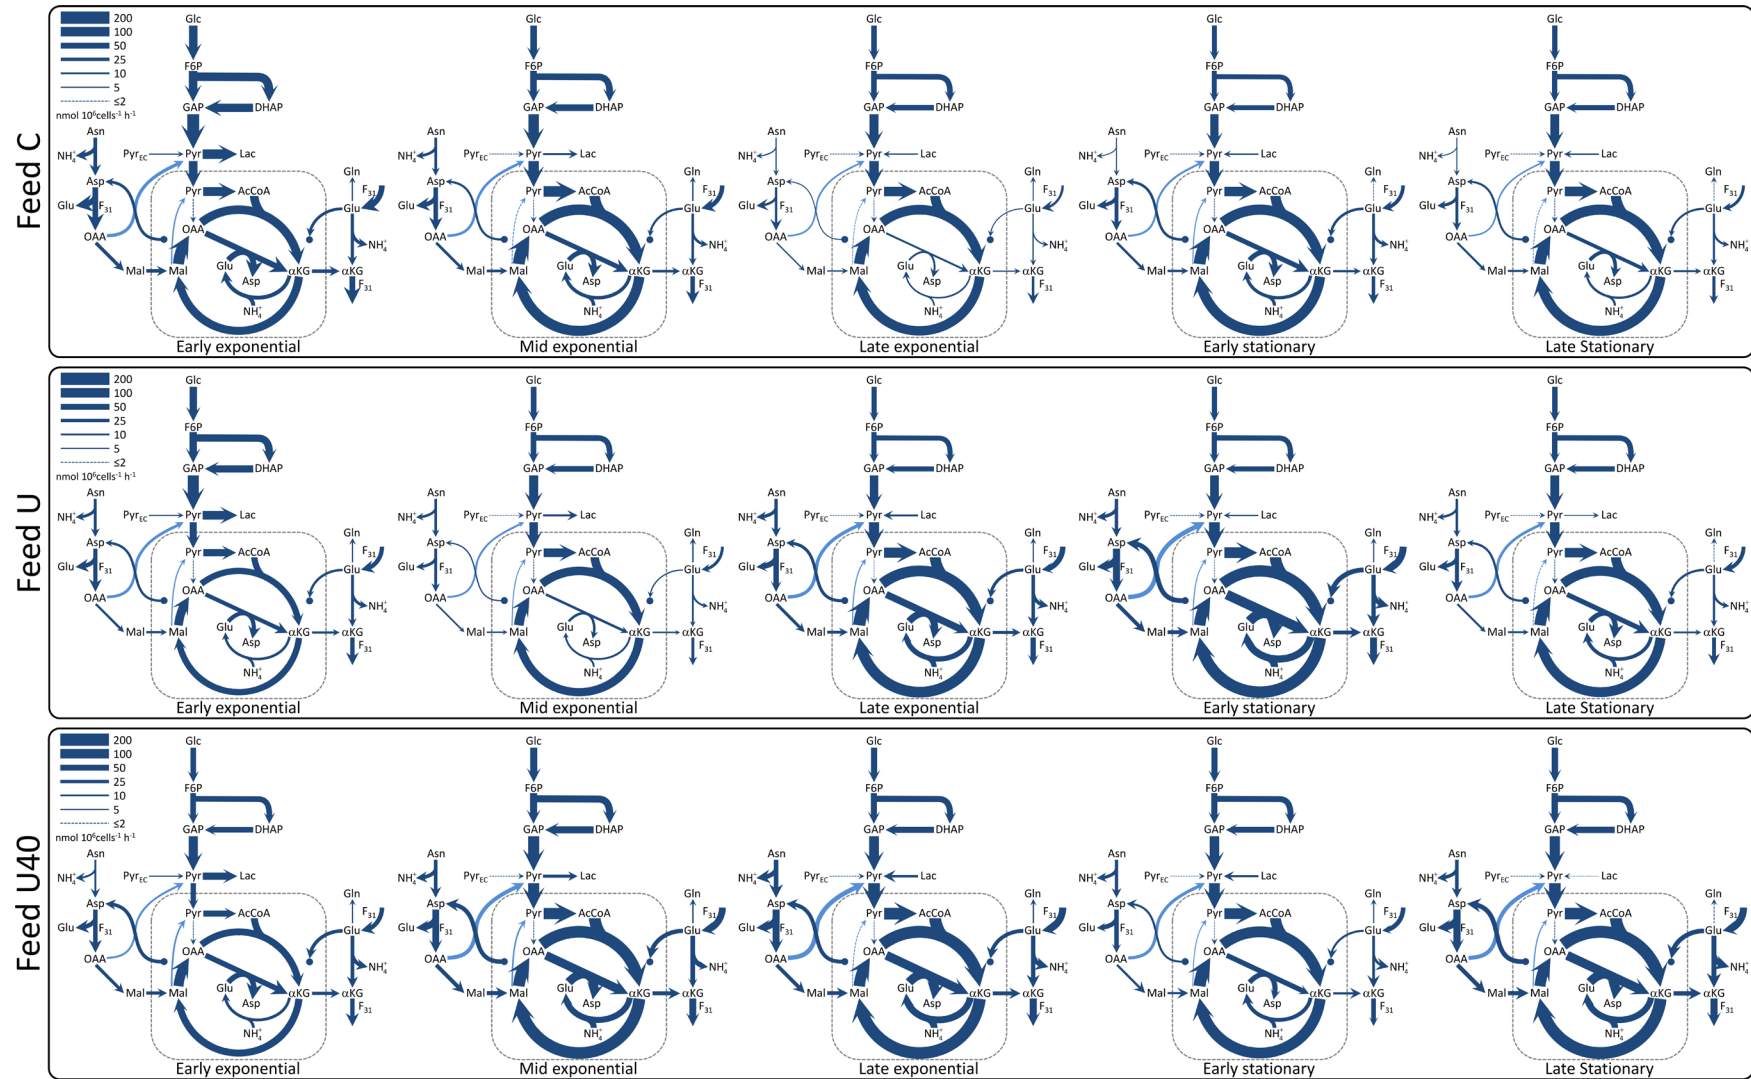

**Figure 3. Flux map comparison**

The flux distributions for central carbon metabolism and the aspartate/malate shuttle are shown for five culture intervals (early, mid, and late exponential as well as early and late stationary) across three feed compositions (Feed C, U, and U40). The line thickness corresponds to flux magnitude, as indicated by the legend at the top left-hand corner of each box.

397  
398  
399  
400  
401

402 For all feed compositions, the glycolytic fluxes decrease with time, with the highest fluxes  
403 observed during early exponential growth and the lowest during stationary growth. The  
404 magnitude of the glycolytic flux is largely determined by the glucose uptake rates, which are  
405 shown to steadily decrease as culture progresses (Supplementary Figure 2). Conversely, the  
406 tricarboxylic acid (TCA) pathway fluxes increase with culture time, which occurs because reduced  
407 lactate production allows for more glycolysis-derived pyruvate to reach mitochondria. This  
408 phenomenon, often referred to as the Warburg effect, has been widely reported for rapidly  
409 proliferating cells, including CHO cells (Buchsteiner et al., 2018; Kelly et al., 2018).

410 The calculated fluxes through the Asp-Mal shuttle are defined by our imposed constraint on  $F_{20}$   
411 (Table 1), which limits its value to the flux of 'free' Glu (i.e., the sum of fluxes where this amino  
412 acid is produced which are not involved in the Asp-Mal shuttle). This constraint was set because  
413 all fluxes along the Asp-Mal shuttle cancel out and, therefore, can have any magnitude if the  
414 transfer of reducing equivalents from cytosolic to mitochondrial NADH is balanced. If left  
415 unconstrained, Asp-Mal shuttle fluxes have been reported to reach values that are comparable to  
416 those through central carbon metabolism (Mulukutla et al., 2012; Nolan and Lee, 2011). Although  
417 mathematically correct, these excessive flux values would be limited by the intracellular  
418 availability of Glu, which is the key substrate for the rate-limiting Asp-Mal shuttle flux ( $F_{20}$ )  
419 (LaNoue et al., 1974; LaNoue and Tischler, 1974). Despite not directly representing Glu  
420 availability, our proposed constraint does limit the upper values of Asp-Mal shuttle fluxes to ones  
421 that fall well below those of glycolysis and, therefore, make them more biologically consistent.

### 422 **3.2.2. Glutamate anaplerosis and cataplerosis**

423 Glutamate can either be consumed towards TCA and energy production (anaplerosis) or  
424 produced from TCA metabolites for subsequent use in biomass generation (cataplerosis).  
425 According to our reaction network, net Glu anaplerosis occurs when more of this amino acid is  
426 transported into mitochondria ( $F_{20}$ ) than what is transported out, in the form of  $\alpha$ KG. Net Glu

427 cataplerosis occurs when less of it is transported into mitochondria than the  $\alpha$ KG transported out.  
428  $\alpha$ KG is then converted into Glu by either  $F_{30}$  or  $F_{31}$ , the latter of which uses Asp as a co-substrate.  
429 Figure 4 shows that, in Feed C, net Glu cataplerosis (Glu produced from TCA) is observed during  
430 the three exponential growth intervals. This trend is reversed during stationary phase, where net  
431 anaplerosis (Glu consumed towards TCA) occurs. Feed U and Feed U40 contrast with Feed C in  
432 that they present Glu anaplerosis (consumption towards TCA) across all but one culture interval  
433 (Figure 4 – bottom).

434 In Feed U, Glu cataplerosis is only observed during mid exponential growth, where its production  
435 from TCA accounts for 42.4% of the total Glu inlet (Figure 4 – top). Another interesting feature  
436 from Feed U is the level of anaplerosis observed during the early stationary interval, where it  
437 accounts for 93.3% of the total consumed Glu (Figure 4 – bottom). This high level of anaplerosis  
438 is associated with increased Glu production from Gln (37.3% of total) and, to a lesser extent, from  
439 His (18.5% of total) (Figure 4 – top). It is worth noting that this is the only culture condition and  
440 interval where Gln is consumed from the extracellular environment (Supplementary Figure 1).

441 In Feed U40, Glu cataplerosis is observed only during the early stationary interval, where 21.4%  
442 of all Glu produced is derived from TCA (Figure 4 – top). Glu cataplerosis during early stationary  
443 phase is most likely to arise to offset the high level of Gln secretion observed during this interval  
444 (Supplementary Figure 1).

445 In our GS-CHO Feed C cultures, Glu cataplerosis is driven by the high Asn uptake rates observed  
446 during exponential growth (Supplementary Figure 2), where a high  $F_{31}$  flux provides a path for  
447 Asn overflow towards pyruvate via oxaloacetate ( $F_{29}$ ). An alternative cataplerotic pathway for  
448 Glu is its direct synthesis from cytosolic  $\alpha$ KG via  $F_{30}$  (catalysed by enzyme [EC 1.4.1.3](#)), which  
449 consumes  $\text{NH}_4^+$  and produces cytosolic  $\text{NAD}^+$  (Yang et al., 2005) and may, thereby, reduce lactate  
450 production (Freund and Croughan, 2018). Its ability to reduce  $\text{NH}_4^+$  and lactate production make  
451 [EC 1.4.1.3](#) a potential target for metabolic engineering.

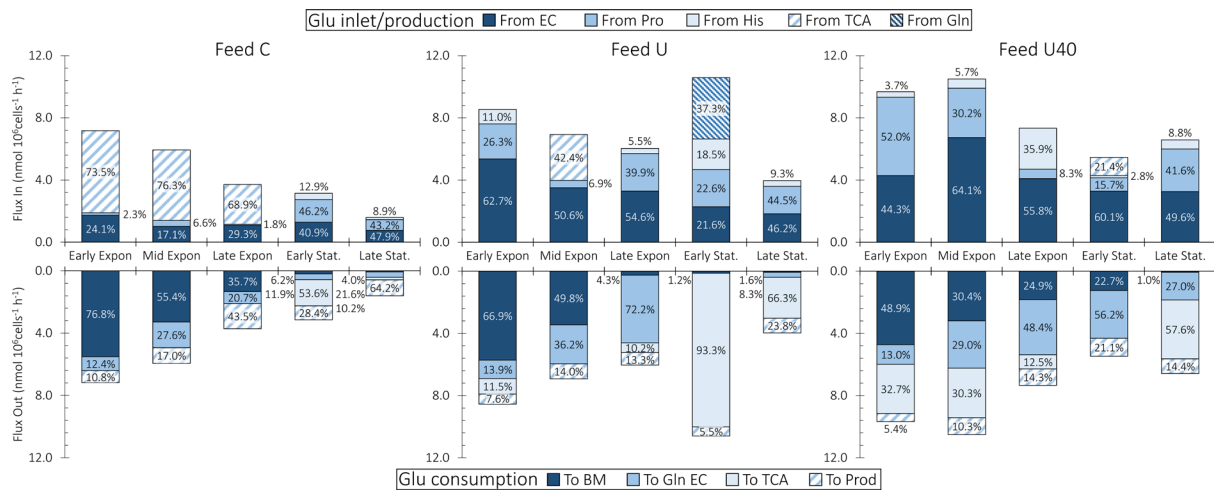

**Figure 4. Glutamate flux distributions**

452

453

454 **The glutamate inlets for all feed compositions are shown in the top half and the outlets are shown**  
 455 **in the bottom half. Glutamate sources and sinks are indicated by the shading and the top and bottom**  
 456 **legends. The percent contributions to the total inlet or outlet are shown within the bars.**

457 Prior flux balance work on standard (non-GS) CHO cells commonly reports net Glu anaplerosis  
 458 during the exponential growth phase of cells, where high lactate production results in low TCA  
 459 fluxes (Ahn and Antoniewicz, 2013). It is thought that Glu anaplerosis is used by the cells to  
 460 replenish flux through TCA and is also known to be a major source of ammonia production  
 461 because much of the anaplerotic flux involves glutamine aminolysis (Dean and Reddy, 2013;  
 462 Wahrheit et al., 2014).

463 In contrast to past work, our FBA results indicate substantial Glu anaplerosis during the  
 464 stationary phases of culture across all three feeding strategies (Figure 4 – bottom). Our results  
 465 suggest that the high uptake rate of Asn observed across all cultures throttles Glu anaplerosis.  
 466 The Asn overflow pathway discussed above produces Glu in F<sub>31</sub>, which, in turn causes Glu  
 467 overflow that is taken up by TCA. Anaplerosis as a means to cope with Glu overflow is also  
 468 substantiated by the early stationary phase flux distribution of Feed U, which presents the highest  
 469 level of Glu anaplerosis observed across all datasets (9.88 nmol/10<sup>6</sup>cells/h) (Figure 4 – bottom).  
 470 This culture interval is the only one across all datasets where glutamine (Gln) is consumed by the  
 471 cells. It is this Gln uptake which causes Glu overflow through the glutaminolysis pathway that is  
 472 commonly reported for non-GS-CHO cells.

473 Glu anaplerosis is commonly described as the cytosolic production of  $\alpha$ KG from Glu (via  $F_{30}$  –  
474 Figure 1), the former of which is transported into the mitochondrial matrix ( $F_{21}$ ) for uptake by  
475 TCA (Ahn and Antoniewicz, 2013; Mulukutla et al., 2012; Nicolae et al., 2014). Crucially, the  
476 transport of  $\alpha$ KG into the mitochondrial matrix depends on malate availability in the cytosol:  $F_{21}$   
477 (OGCP) has an antiport mechanism whereby one molecule of  $\alpha$ KG is transported into the  
478 mitochondrial lumen for every malate molecule that is transported out (Iacobazzi et al., 1992).

479 Our results indicate an alternative mechanism for Glu anaplerosis, where Glu is first transported  
480 into the mitochondrial matrix (via  $F_{20}$  – the rate-limiting and only irreversible reaction of the Asp-  
481 Mal shuttle (LaNoue et al., 1974; LaNoue and Tischler, 1974)) where it is then converted, with the  
482 consumption of mitochondrial Asp, into  $\alpha$ KG via  $F_{22}$ . This alternative mechanism arises from the  
483 high Asn uptake by our GS-CHO cells, where a substantial amount of this nutrient is funnelled  
484 towards cytosolic malate through reactions  $F_{51}$ ,  $F_{31}$ , and  $F_{24}$ . This Asn overflow pushes  $\alpha$ KG out  
485 of the mitochondrial matrix where it can be consumed to produce Glu, mainly through  $F_{31}$ .  
486 Irrespective of the metabolic route, the magnitudes of Glu anaplerosis and cataplerosis are  
487 consistent with those determined through Metabolic Flux Analysis (Ahn and Antoniewicz, 2013;  
488 Nicolae et al., 2014).

### 489 **3.2.3. Asparagine and aspartate are key anaplerotic nutrients**

490 The asparagine/aspartate pair (Asn/Asp), linked through  $F_{51}$ , is a key contributor to TCA flux  
491 through its sequential conversion to oxaloacetate ( $F_{31}$ ) and pyruvate ( $F_{29}$ ), the latter of which is  
492 ultimately transported into mitochondria for consumption in the TCA. Because alanine and  
493 lactate are also produced from pyruvate (through reactions  $F_{26}$  and  $F_{25}$ , respectively), the  
494 Asn/Asp pair is also a key source of these metabolites.

495 During the early exponential interval, cells cultured with Feed C consume 43.9% of Asn/Asp  
496 towards TCA and 34.1% towards lactate (Figure 5 – bottom). As lactate secretion subsides, the  
497 contribution of Asn/Asp towards TCA increases to beyond 70% for the remaining culture

498 intervals. The trend for Asn/Asp consumption towards TCA is even more pronounced for cells  
 499 cultured with Feeds U and U40, where it exceeds 85% across the final three culture intervals.

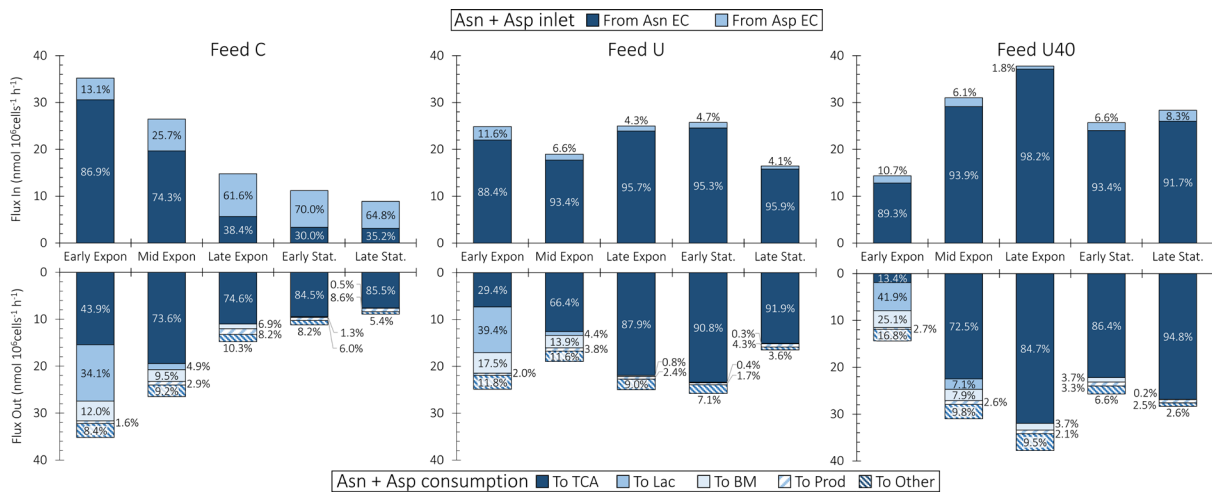

500

501

**Figure 5. Asparagine + Aspartate flux distributions**

502 **The sources for asparagine (Asn) and aspartate (Asp) for all feed compositions is shown in the top**  
 503 **half and the sinks are shown in the bottom half. The source and sink fluxes for Asn and Asp have**  
 504 **been summed for simplicity. The different Asn+Asp sources and sinks are indicated by the shading**  
 505 **and the top and bottom legends. The percent contributions to the total sources and sinks are shown**  
 506 **within the bars.**

507 Across all feeds, the maximum proportion of Asn/Asp consumed towards biomass and mAb  
 508 product is 27.8% for Feed U40 during early exponential phase (Figure 5 – bottom). These results  
 509 show that Asn/Asp are fed well beyond stoichiometric requirements for growth and product  
 510 formation and that anaplerosis provides an overflow pathway for when these nutrients are fed in  
 511 excess. These results are consistent with prior work where excess Asn/Asp feeding has been  
 512 observed to increase alanine and lactate secretion by CHO cells (Calmels et al., 2019; Selvarasu et  
 513 al., 2012).

514 The anaplerotic overflow pathway for Asn/Asp results in a rapid uptake of Asn and a concomitant  
 515 reduction in its concentration in the culture medium (Supplementary Figure 1). Particularly low  
 516 residual Asn concentrations are observed in the Feed C culture, where Asn and Asp are fed at the  
 517 lowest levels. In absence of flux balance calculations, the observed reduction in Asn availability



518 could be interpreted as being growth limiting and would lead to increasing the concentration of  
519 Asn in the media and/or feed to alleviate the perceived bottleneck. Our experimental and FBA  
520 results demonstrate that Asn is indeed not a growth limiting nutrient, and that increasing its  
521 concentration in the feed in fact reduces cell growth (Supplementary Figure 1), likely due to the  
522 production of ammonia associated with Asn anaplerosis. Similar observations were recently  
523 reported by Calmels et al. (2019), where GeM FBA calculations were applied to industrial CHO  
524 DG44 cells.

525 FBA also allows us to estimate the Asn/Asp uptake rates at which the anaplerotic pathway  
526 becomes saturated (i.e., where no more Asn/Asp can be funnelled towards TCA). The raw  
527 experimental data shows that Asp accumulates in the extracellular environment of Feed U40  
528 cultures during the late exponential, early stationary, and stationary phases (Supplementary  
529 Figure 1) implying that, under these conditions, the cells resort to secreting Asp instead of  
530 consuming it towards central carbon metabolism. The flux of Asn/Asp towards TCA during these  
531 culture phases are 38.7 nmol/10<sup>6</sup>cells/h, 25.7 nmol/10<sup>6</sup>cells/h, and 32.1 nmol/10<sup>6</sup>cells/h,  
532 respectively and represent the range of Asn/Asp overflow our GS-CHO cells can cope with.  
533 Interestingly, these values closely correlate with the values of total available Glu flux, which are  
534 7.3 nmol/10<sup>6</sup>cells/h, 5.5 nmol/10<sup>6</sup>cells/h, and 6.6 nmol/10<sup>6</sup>cells/h for the corresponding culture  
535 intervals. This correlation indicates that intracellular Glu availability may regulate the extent of  
536 Asn/Asp anaplerosis.

#### 537 **3.2.4. NH<sub>4</sub><sup>+</sup> sources and sinks**

538 NH<sub>4</sub><sup>+</sup> is a key determinant of CHO cell culture performance because it is known to impact cell  
539 growth (Synoground et al., 2021; Wahrheit et al., 2014) as well as product quality (Borys et al.,  
540 1994; Hong et al., 2010). In standard CHO cells, NH<sub>4</sub><sup>+</sup> is mainly generated as a by-product of Gln  
541 anaplerosis (glutaminolysis) (Dean and Reddy, 2013; Hong et al., 2010; Wahrheit et al., 2014).  
542 Glutamine synthase (GS) cells, such as the ones used in this study, satisfy their Gln requirements  
543 by producing it from Glu via ectopic expression of glutamine synthase, thus circumventing the

544 negative impact of  $\text{NH}_4^+$  on the cell culture process. Despite considerable reductions in  $\text{NH}_4^+$   
545 accumulation, GS-CHO cells still produce ammonia to levels that may still impact product  
546 glycosylation (Borys et al., 1994; Hong et al., 2010) so it is therefore important to characterise the  
547 major sources and sinks of this key metabolite.

548 The dark blue bars in the top half of Figure 6 show that the vast majority (>75%) of ammonia is  
549 produced from asparagine ( $F_{51}$ ). The only exceptions are the Early Stationary intervals of Feed C  
550 and Feed U where, respectively, Asn is the source of 46.4% and 67.5% of all produced  $\text{NH}_4^+$ .  
551 During the Early Stationary phase of Feed C, the lower levels of  $\text{NH}_4^+$  production from Asn are due  
552 to depletion of this nutrient in the culture media along with  $\text{NH}_4^+$  uptake by the cells  
553 (Supplementary Figure 1). In Feed U, the lower proportion of  $\text{NH}_4^+$  generated from Asn is caused  
554 by glutaminolysis – this is the only interval across all experiments where Gln is consumed by the  
555 cells (Supplementary Figure 1). Additional sources of  $\text{NH}_4^+$  include Ser ( $F_{36}$ ), Thr ( $F_{37}$ ) and His  
556 ( $F_{54}$ ), although to much lower levels, when compared with Asn. These results indicate that, in GS-  
557 CHO cells,  $\text{NH}_4^+$  production is throttled by the Asn/Asp anaplerosis discussed in section 3.2.3 and  
558 is consistent with previous work with GS-CHO cells (Calmels et al., 2019; Carinhas et al., 2013).

559 The total production rate of  $\text{NH}_4^+$  further confirms its link with Asn/Asp anaplerosis. The top half  
560 of Figure 6 shows that the total amount of  $\text{NH}_4^+$  produced by the cells increases with higher levels  
561 of Asn feeding. After the Mid Exponential interval, cells cultured with basal Asn feeding levels  
562 (Feed C) have  $\text{NH}_4^+$  production rates below 8 nmol/ $10^6$ cells/h, whereas the Feed U and Feed U40  
563 cultures (increasingly higher levels of Asn feeding) produce above 20 nmol/ $10^6$ cells/h of  $\text{NH}_4^+$ .

564 The bottom half of Figure 6 presents the major  $\text{NH}_4^+$  sinks across the three feed conditions, as  
565 obtained through our FBA framework. There, it can be seen that three  $\text{NH}_4^+$  sinks predominate:  
566 (i) secretion to the extracellular (EC) environment (dark blue bars –  $F_{108}$ ), (ii) consumption in  
567 mitochondria (intermediate blue bars) and (iii) consumption towards Gln synthesis (light blue  
568 bars –  $F_{32}$ ). Of the three major sinks, EC secretion can be deduced from the experimental data. The  
569 sink towards Gln synthesis is similarly intuitive and occurs because our GS-CHO cells are not fed

570 Gln and must cover their demand for this amino acid through its GS-enabled synthesis using Glu  
 571 and  $\text{NH}_4^+$  as substrates.

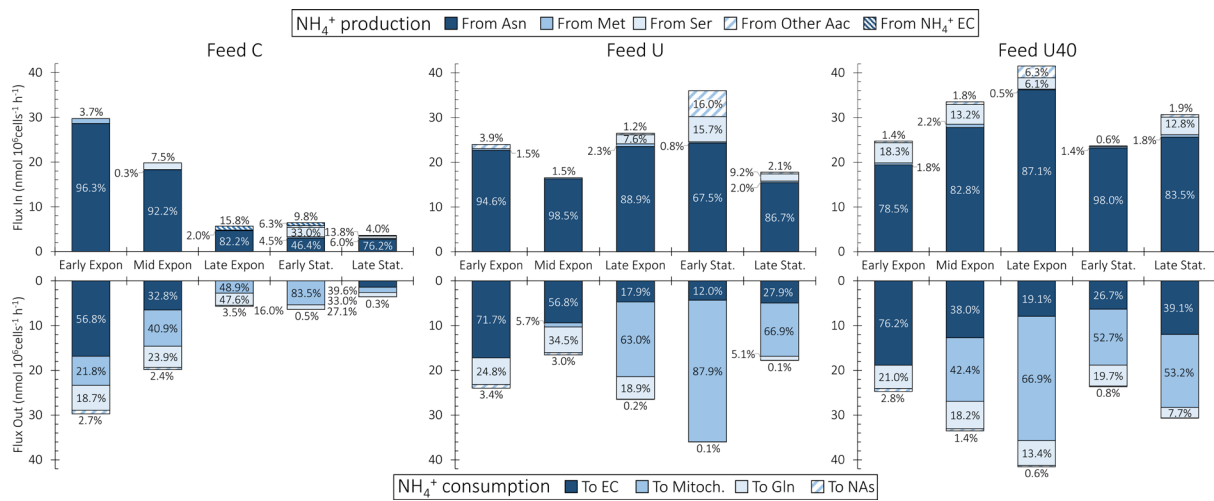

572 **Figure 6.  $\text{NH}_4^+$  Flux distributions**

573  
 574 **The  $\text{NH}_4^+$  sources for all feed compositions are shown in the top half and the sinks are shown in the**  
 575 **bottom half. The different sources and sinks are indicated by the shading and the top and bottom**  
 576 **legends. The percent contribution of each source/sink to the total produced/consumed is shown**  
 577 **within the bars.**

578 The less intuitive  $\text{NH}_4^+$  sink is the one associated with mitochondria. According to our FBA results,  
 579 a substantial amount of  $\text{NH}_4^+$  is consumed by a mitochondrial reaction cycle, where OAA is  
 580 combined with Glu to produce  $\alpha\text{KG}$  and Asp ( $F_{22}$ ) and where the resulting  $\alpha\text{KG}$  is combined with  
 581  $\text{NH}_4^+$  to produce Glu ( $F_{23}$ ). This mitochondrial  $\text{NH}_4^+$  sink is governed by the presence of Asp within  
 582 the mitochondrial lumen and is therefore coupled with the Asp-Mal shuttle, where  $F_{20}$  transports  
 583 Asp out of mitochondria. If Asp accumulates within mitochondria,  $F_{22}$  and  $F_{23}$  will be reversed  
 584 and may, thereby, cause net  $\text{NH}_4^+$  production by mitochondria. These results are consistent with  
 585 experimental findings where high  $\text{NH}_4^+$  concentrations increased the cell specific consumption  
 586 rates of Asp and Glu (Lao and Toth, 1997).

587 Due to the constraint imposed on  $F_{20}$  by our FBA solution strategy (discussed in Section 2.2.2 and  
 588 presented in Table 1), a second sink for mitochondrial Asp is required to drive mitochondrial  
 589  $\text{NH}_4^+$  consumption. Within our FBA reaction network, this additional sink is given by  $F_{59}$  of the

590 urea cycle, where mitochondrial Asp is irreversibly combined with citrulline to produce fumarate  
591 and arginine (Supplementary Table 1). Our results indicate that  $F_{59}$  consumes over half of the  
592 mitochondrial Asp across all culture conditions (Supplementary Figure 5) and is, therefore, a key  
593 determinant of mitochondrial consumption of  $\text{NH}_4^+$ .

594 The above mitochondrial Asp sink ( $F_{59}$ ) enables mitochondrial consumption of  $\text{NH}_4^+$  that is  
595 independent of the Asp-Mal shuttle and, therefore, of cytosolic Glu availability. This Glu-  
596 independent  $\text{NH}_4^+$  detoxification pathway would require diverting aKG directly from TCA to be  
597 consumed in reaction  $F_{23}$ . The produced Glu would then react with TCA-derived oxaloacetate to  
598 replenish aKG and produce mitochondrial Asp ( $F_{22}$ ). Finally, mitochondrial Asp would be  
599 consumed by  $F_{59}$  to yield arginine and fumarate, which could also feed back into TCA.

600 Interestingly, CHO cells are reported to produce only trace amounts of urea (Zamorano et al.,  
601 2010), indicating that certain enzymes of the cycle may be inactive. The mitochondrial sink  
602 identified by our FBA may be an alternate route of  $\text{NH}_4^+$  detoxification (independent of urea  
603 secretion) that leverages two of the urea cycle enzymes ([EC 6.3.4.5](#) and [EC 4.3.2.1](#)) which are  
604 known to be expressed in CHO cells (Heffner et al., 2020).

#### 605 **4. Concluding remarks**

606 We have presented a reduced reaction network to describe the metabolism of mAb-producing  
607 CHO cells. Our reduced metabolic network (144 reactions) performs comparably with the  
608 iCHO1766 GeM (>6000 reactions) in predicting the growth rates of different CHO cell lines. Our  
609 FBA framework also allowed us to identify the absence of cellular weight and composition  
610 measurements as the most likely cause of inaccuracies in predicting the growth rates.

611 We have also presented a comprehensive multi-objective optimisation strategy to solve our  
612 metabolic model. Our multi-objective optimisation framework constrains the solution space to  
613 yield physiologically consistent flux distributions across all phases of cell culture.

614 When coupled with multi-objective optimisation, our compact reaction network greatly enhances  
615 the interpretability of metabolic flux distributions across the different phases of cell culture. In  
616 this context, our results provide insights into the mechanisms underlying Glu anaplerosis and its  
617 dependence on the uptake rate of Asn/Asp. We have also identified Asn and Asp as the key  
618 anaplerotic nutrients of GS-CHO cells and that, in this role, they are an important source of lactate  
619 during the early stages of culture.

620 Our results also show that Asn is the predominant source of  $\text{NH}_4^+$  across all culture conditions  
621 and that the major sink for this key metabolite is consumption within mitochondria. The presence  
622 of Asp within mitochondria determines whether this organelle is a source or sink of  $\text{NH}_4^+$ : when  
623 Asp accumulates, mitochondria can become a net source of  $\text{NH}_4^+$ , when Asp is depleted,  $\text{NH}_4^+$  is  
624 consumed within mitochondria. The Asp-Mal shuttle determines the intracellular flux  
625 distributions of Asn, Asp, Gln, Glu and  $\text{NH}_4^+$ . Our FBA solution strategy constrains fluxes through  
626 the Asp-Mal to not exceed the flux of 'free' Glu entering or produced by the cells in order to obtain  
627 physiologically consistent flux distributions for Asn, Asp, Gln, Glu and  $\text{NH}_4^+$ .

628 Moving forward, the enhanced understanding of metabolic dynamics afforded by our reduced  
629 reaction network and multi-objective optimisation framework can be used to define feeding  
630 strategies that optimise cell culture performance. Furthermore, the compact size of our reaction  
631 network will also facilitate the creation of hybrid dynamic FBA/culture dynamics models which  
632 can be used as digital twins for dynamic optimisation and control of cell culture bioprocesses.

### 633 **Acknowledgements**

634 CK and IJV gratefully acknowledge funding by BRIC/BBSRC. IJV also acknowledges funding from  
635 Science Foundation Ireland (12/RC/2275\_P2). This manuscript is dedicated in memory of Aoife  
636 Carney, Administrative Officer, School of Chemical & Bioprocess Engineering, University College  
637 Dublin.

### 638 **Conflict of interest statement**

639 The authors declare no conflicts of interest.

640 **References**

- 641 Ahn, W. S., Antoniewicz, M. R., 2013. Parallel labeling experiments with [1,2-(13)C]glucose and  
642 [U-(13)C]glutamine provide new insights into CHO cell metabolism. *Metab Eng.* 15, 34-47.  
643 <https://doi.org/10.1016/j.ymben.2012.10.001>.
- 644 Albrecht, S., Lane, J. A., Marino, K., Al Busadah, K. A., Carrington, S. D., Hickey, R. M., Rudd, P. M.,  
645 2014. A comparative study of free oligosaccharides in the milk of domestic animals. *Br J*  
646 *Nutr.* 111, 1313-28. <https://doi.org/10.1017/S0007114513003772>.
- 647 Banga, J. R., 2008. Optimization in computational systems biology. *BMC Syst Biol.* 2, 47.  
648 <https://doi.org/10.1186/1752-0509-2-47>.
- 649 Baycin-Hizal, D., Tabb, D. L., Chaerkady, R., Chen, L., Lewis, N. E., Nagarajan, H., Sarkaria, V., Kumar,  
650 A., Wolozny, D., Colao, J., Jacobson, E., Tian, Y., O'Meally, R. N., Krag, S. S., Cole, R. N., Palsson,  
651 B. O., Zhang, H., Betenbaugh, M., 2012. Proteomic analysis of Chinese hamster ovary cells. *J*  
652 *Proteome Res.* 11, 5265-76. <https://doi.org/10.1021/pr300476w>.
- 653 Borys, M. C., Linzer, D. I., Papoutsakis, E. T., 1994. Ammonia affects the glycosylation patterns of  
654 recombinant mouse placental lactogen-I by chinese hamster ovary cells in a pH-dependent  
655 manner. *Biotechnol Bioeng.* 43, 505-14. <https://doi.org/10.1002/bit.260430611>.
- 656 Brady, R. L., Hubbard, R. E., King, D. J., Low, D. C., Roberts, S. M., Todd, R. J., 1991. Crystallization  
657 and preliminary X-ray diffraction study of a chimaeric Fab' fragment of antibody binding  
658 tumour cells. *J Mol Biol.* 219, 603-4.
- 659 Buchsteiner, M., Quek, L. E., Gray, P., Nielsen, L. K., 2018. Improving culture performance and  
660 antibody production in CHO cell culture processes by reducing the Warburg effect.  
661 *Biotechnol Bioeng.* 115, 2315-2327. <https://doi.org/10.1002/bit.26724>.
- 662 Calmels, C., McCann, A., Malphettes, L., Andersen, M. R., 2019. Application of a curated genome-  
663 scale metabolic model of CHO DG44 to an industrial fed-batch process. *Metab Eng.* 51, 9-19.  
664 <https://doi.org/10.1016/j.ymben.2018.09.009>.

- 665 Campbell, M. P., Royle, L., Radcliffe, C. M., Dwek, R. A., Rudd, P. M., 2008. GlycoBase and autoGU:  
666 tools for HPLC-based glycan analysis. *Bioinformatics*. 24, 1214-6.  
667 <https://doi.org/10.1093/bioinformatics/btn090>.
- 668 Carinhas, N., Duarte, T. M., Barreiro, L. C., Carrondo, M. J., Alves, P. M., Teixeira, A. P., 2013.  
669 Metabolic signatures of GS-CHO cell clones associated with butyrate treatment and culture  
670 phase transition. *Biotechnol Bioeng*. 110, 3244-57. <https://doi.org/10.1002/bit.24983>.
- 671 Chen, Y., McConnell, B. O., Gayatri Dhara, V., Mukesh Naik, H., Li, C. T., Antoniewicz, M. R.,  
672 Betenbaugh, M. J., 2019. An unconventional uptake rate objective function approach  
673 enhances applicability of genome-scale models for mammalian cells. *NPJ Syst Biol Appl*. 5,  
674 25. <https://doi.org/10.1038/s41540-019-0103-6>.
- 675 Dean, J., Reddy, P., 2013. Metabolic analysis of antibody producing CHO cells in fed-batch  
676 production. *Biotechnol Bioeng*. 110, 1735-47. <https://doi.org/10.1002/bit.24826>.
- 677 del Val, I. J., Fan, Y., Weilguny, D., 2016a. Dynamics of immature mAb glycoform secretion during  
678 CHO cell culture: An integrated modelling framework. *Biotechnol J*. 11, 610-23.  
679 <https://doi.org/10.1002/biot.201400663>.
- 680 del Val, I. J., Polizzi, K. M., Kontoravdi, C., 2016b. A theoretical estimate for nucleotide sugar  
681 demand towards Chinese Hamster Ovary cellular glycosylation. *Sci Rep*. 6, 28547.  
682 <https://doi.org/10.1038/srep28547>.
- 683 Fan, Y., del Val, I. J., Muller, C., Lund, A. M., Sen, J. W., Rasmussen, S. K., Kontoravdi, C., Baycin-Hizal,  
684 D., Betenbaugh, M. J., Weilguny, D., Andersen, M. R., 2015. A multi-pronged investigation into  
685 the effect of glucose starvation and culture duration on fed-batch CHO cell culture.  
686 *Biotechnol Bioeng*. 112, 2172-84. <https://doi.org/10.1002/bit.25620>.
- 687 Feist, A. M., Palsson, B. O., 2010. The biomass objective function. *Curr Opin Microbiol*. 13, 344-9.  
688 <https://doi.org/10.1016/j.mib.2010.03.003>.
- 689 Fouladiha, H., Marashi, S. A., Li, S., Li, Z., Masson, H. O., Vaziri, B., Lewis, N. E., 2021. Systematically  
690 gap-filling the genome-scale metabolic model of CHO cells. *Biotechnol Lett*. 43, 73-87.  
691 <https://doi.org/10.1007/s10529-020-03021-w>.

- 692 Freund, N. W., Croughan, M. S., 2018. A Simple Method to Reduce both Lactic Acid and Ammonium  
693 Production in Industrial Animal Cell Culture. *Int J Mol Sci.* 19.  
694 <https://doi.org/10.3390/ijms19020385>.
- 695 Gardner, J. J., Boyle, N. R., 2017. The use of genome-scale metabolic network reconstruction to  
696 predict fluxes and equilibrium composition of N-fixing versus C-fixing cells in a diazotrophic  
697 cyanobacterium, *Trichodesmium erythraeum*. *BMC Syst Biol.* 11, 4.  
698 <https://doi.org/10.1186/s12918-016-0383-z>.
- 699 Gutierrez, J. M., Feizi, A., Li, S., Kallehauge, T. B., Hefzi, H., Grav, L. M., Ley, D., Baycin Hizal, D.,  
700 Betenbaugh, M. J., Voldborg, B., Fastrup Kildegaard, H., Min Lee, G., Palsson, B. O., Nielsen,  
701 J., Lewis, N. E., 2020. Genome-scale reconstructions of the mammalian secretory pathway  
702 predict metabolic costs and limitations of protein secretion. *Nat Commun.* 11, 68.  
703 <https://doi.org/10.1038/s41467-019-13867-y>.
- 704 Heffner, K., Hizal, D. B., Majewska, N. I., Kumar, S., Dhara, V. G., Zhu, J., Bowen, M., Hatton, D.,  
705 Yerganian, G., Yerganian, A., O'Meally, R., Cole, R., Betenbaugh, M., 2020. Expanded Chinese  
706 hamster organ and cell line proteomics profiling reveals tissue-specific functionalities. *Sci*  
707 *Rep.* 10, 15841. <https://doi.org/10.1038/s41598-020-72959-8>.
- 708 Hefzi, H., Ang, K. S., Hanscho, M., Bordbar, A., Ruckerbauer, D., Lakshmanan, M., Orellana, C. A.,  
709 Baycin-Hizal, D., Huang, Y., Ley, D., Martinez, V. S., Kyriakopoulos, S., Jimenez, N. E., Zielinski,  
710 D. C., Quek, L. E., Wulff, T., Arnsdorf, J., Li, S., Lee, J. S., Paglia, G., Loira, N., Spahn, P. N.,  
711 Pedersen, L. E., Gutierrez, J. M., King, Z. A., Lund, A. M., Nagarajan, H., Thomas, A., Abdel-  
712 Haleem, A. M., Zanghellini, J., Kildegaard, H. F., Voldborg, B. G., Gerdtzen, Z. P., Betenbaugh,  
713 M. J., Palsson, B. O., Andersen, M. R., Nielsen, L. K., Borth, N., Lee, D. Y., Lewis, N. E., 2016. A  
714 Consensus Genome-scale Reconstruction of Chinese Hamster Ovary Cell Metabolism. *Cell*  
715 *Syst.* 3, 434-443 e8. <https://doi.org/10.1016/j.cels.2016.10.020>.
- 716 Heilig, R., Eckenberg, R., Petit, J. L., Fonknechten, N., Da Silva, C., Cattolico, L., Levy, M., Barbe, V.,  
717 de Berardinis, V., Ureta-Vidal, A., Pelletier, E., Vico, V., Anthouard, V., Rowen, L., Madan, A.,  
718 Qin, S., Sun, H., Du, H., Pepin, K., Artiguenave, F., Robert, C., Cruaud, C., Bruls, T., Jaillon, O.,



719 Friedlander, L., Samson, G., Brottier, P., Cure, S., Segurens, B., Aniere, F., Samain, S., Crespeau,  
720 H., Abbasi, N., Aiach, N., Boscus, D., Dickhoff, R., Dors, M., Dubois, I., Friedman, C.,  
721 Gouyvenoux, M., James, R., Madan, A., Mairey-Estrada, B., Mangenot, S., Martins, N., Menard,  
722 M., Oztas, S., Ratcliffe, A., Shaffer, T., Trask, B., Vacherie, B., Bellemere, C., Belser, C., Besnard-  
723 Gonnet, M., Bartol-Mavel, D., Boutard, M., Briez-Silla, S., Combette, S., Dufosse-Laurent, V.,  
724 Ferron, C., Lechaplais, C., Louesse, C., Muselet, D., Magdelenat, G., Pateau, E., Petit, E., Sirvain-  
725 Trukniewicz, P., Trybou, A., Vega-Czarny, N., Bataille, E., Bluet, E., Bordelais, I., Dubois, M.,  
726 Dumont, C., Guerin, T., Haffray, S., Hammadi, R., Muanga, J., Pellouin, V., Robert, D., Wunderle,  
727 E., Gauguet, G., Roy, A., Sainte-Marthe, L., Verdier, J., Verdier-Discalca, C., Hillier, L., Fulton, L.,  
728 McPherson, J., Matsuda, F., Wilson, R., Scarpelli, C., Gyapay, G., Wincker, P., Saurin, W.,  
729 Quetier, F., Waterston, R., Hood, L., Weissenbach, J., 2003. The DNA sequence and analysis of  
730 human chromosome 14. *Nature*. 421, 601-7. <https://doi.org/10.1038/nature01348>.  
731 Hong, J. K., Cho, S. M., Yoon, S. K., 2010. Substitution of glutamine by glutamate enhances  
732 production and galactosylation of recombinant IgG in Chinese hamster ovary cells. *Appl*  
733 *Microbiol Biotechnol*. 88, 869-76. <https://doi.org/10.1007/s00253-010-2790-1>.  
734 Iacobazzi, V., Palmieri, F., Runswick, M. J., Walker, J. E., 1992. Sequences of the human and bovine  
735 genes for the mitochondrial 2-oxoglutarate carrier. *DNA Seq.* 3, 79-88.  
736 <https://doi.org/10.3109/10425179209034000>.  
737 Jeske, L., Placzek, S., Schomburg, I., Chang, A., Schomburg, D., 2019. BRENDA in 2019: a European  
738 ELIXIR core data resource. *Nucleic Acids Res.* 47, D542-D549.  
739 <https://doi.org/10.1093/nar/gky1048>.  
740 Kanehisa, M., Furumichi, M., Tanabe, M., Sato, Y., Morishima, K., 2017. KEGG: new perspectives on  
741 genomes, pathways, diseases and drugs. *Nucleic Acids Res.* 45, D353-D361.  
742 <https://doi.org/10.1093/nar/gkw1092>.  
743 Kanehisa, M., Sato, Y., Furumichi, M., Morishima, K., Tanabe, M., 2019. New approach for  
744 understanding genome variations in KEGG. *Nucleic Acids Res.* 47, D590-D595.  
745 <https://doi.org/10.1093/nar/gky962>.

- 746 Kelly, P. S., Alarcon Miguez, A., Alves, C., Barron, N., 2018. From media to mitochondria–rewiring  
747 cellular energy metabolism of Chinese hamster ovary cells for the enhanced production of  
748 biopharmaceuticals. *Current Opinion in Chemical Engineering*. 22, 71-80.  
749 <https://doi.org/https://doi.org/10.1016/j.coche.2018.08.009>.
- 750 Kol, S., Ley, D., Wulff, T., Decker, M., Arnsdorf, J., Schoffelen, S., Hansen, A. H., Jensen, T. L., Gutierrez,  
751 J. M., Chiang, A. W. T., Masson, H. O., Palsson, B. O., Voldborg, B. G., Pedersen, L. E., Kildegaard,  
752 H. F., Lee, G. M., Lewis, N. E., 2020. Multiplex secretome engineering enhances recombinant  
753 protein production and purity. *Nat Commun*. 11, 1908. [https://doi.org/10.1038/s41467-](https://doi.org/10.1038/s41467-020-15866-w)  
754 [020-15866-w](https://doi.org/10.1038/s41467-020-15866-w).
- 755 Kremkow, B. G., Baik, J. Y., MacDonald, M. L., Lee, K. H., 2015. CHOgenome.org 2.0: Genome  
756 resources and website updates. *Biotechnol J*. 10, 931-8.  
757 <https://doi.org/10.1002/biot.201400646>.
- 758 Kremkow, B. G., Lee, K. H., 2018. Glyco-Mapper: A Chinese hamster ovary (CHO) genome-specific  
759 glycosylation prediction tool. *Metab Eng*. 47, 134-142.  
760 <https://doi.org/10.1016/j.ymben.2018.03.002>.
- 761 Kyriakopoulos, S., Kontoravdi, C., 2014. A framework for the systematic design of fed-batch  
762 strategies in mammalian cell culture. *Biotechnol Bioeng*. 111, 2466-76.  
763 <https://doi.org/10.1002/bit.25319>.
- 764 LaNoue, K. F., Meijer, A. J., Brouwer, A., 1974. Evidence for electrogenic aspartate transport in rat  
765 liver mitochondria. *Arch Biochem Biophys*. 161, 544-50.
- 766 LaNoue, K. F., Tischler, M. E., 1974. Electrogenic characteristics of the mitochondrial glutamate-  
767 aspartate antiporter. *J Biol Chem*. 249, 7522-8.
- 768 Lao, M. S., Toth, D., 1997. Effects of ammonium and lactate on growth and metabolism of a  
769 recombinant Chinese hamster ovary cell culture. *Biotechnol Prog*. 13, 688-91.  
770 <https://doi.org/10.1021/bp9602360>.
- 771 Lewis, N. E., Hixson, K. K., Conrad, T. M., Lerman, J. A., Charusanti, P., Polpitiya, A. D., Adkins, J. N.,  
772 Schramm, G., Purvine, S. O., Lopez-Ferrer, D., Weitz, K. K., Eils, R., Konig, R., Smith, R. D.,

- 773 Palsson, B. O., 2010. Omic data from evolved *E. coli* are consistent with computed optimal  
774 growth from genome-scale models. *Mol Syst Biol.* 6, 390.  
775 <https://doi.org/10.1038/msb.2010.47>.
- 776 Lewis, N. E., Liu, X., Li, Y., Nagarajan, H., Yerganian, G., O'Brien, E., Bordbar, A., Roth, A. M.,  
777 Rosenbloom, J., Bian, C., Xie, M., Chen, W., Li, N., Baycin-Hizal, D., Latif, H., Forster, J.,  
778 Betenbaugh, M. J., Famili, I., Xu, X., Wang, J., Palsson, B. O., 2013. Genomic landscapes of  
779 Chinese hamster ovary cell lines as revealed by the *Cricetulus griseus* draft genome. *Nat*  
780 *Biotechnol.* 31, 759-65. <https://doi.org/10.1038/nbt.2624>.
- 781 Lularevic, M., Racher, A. J., Jaques, C., Kiparissides, A., 2019. Improving the accuracy of flux balance  
782 analysis through the implementation of carbon availability constraints for intracellular  
783 reactions. *Biotechnol Bioeng.* 116, 2339-2352. <https://doi.org/10.1002/bit.27025>.
- 784 Martínez, V. S., Buchsteiner, M., Gray, P., Nielsen, L. K., Quek, L.-E., 2015. Dynamic metabolic flux  
785 analysis using B-splines to study the effects of temperature shift on CHO cell metabolism.  
786 *Metabolic Engineering Communications.* 2, 46-57.  
787 <https://doi.org/https://doi.org/10.1016/j.meteno.2015.06.001>.
- 788 Mulukutla, B. C., Gramer, M., Hu, W. S., 2012. On metabolic shift to lactate consumption in fed-  
789 batch culture of mammalian cells. *Metab Eng.* 14, 138-49.  
790 <https://doi.org/10.1016/j.ymben.2011.12.006>.
- 791 Nicolae, A., Wahrheit, J., Bahnemann, J., Zeng, A. P., Heinzle, E., 2014. Non-stationary <sup>13</sup>C metabolic  
792 flux analysis of Chinese hamster ovary cells in batch culture using extracellular labeling  
793 highlights metabolic reversibility and compartmentation. *BMC Syst Biol.* 8, 50.  
794 <https://doi.org/10.1186/1752-0509-8-50>.
- 795 Nolan, R. P., Lee, K., 2011. Dynamic model of CHO cell metabolism. *Metab Eng.* 13, 108-24.  
796 <https://doi.org/10.1016/j.ymben.2010.09.003>.
- 797 O'Flaherty, R., Bergin, A., Flampouri, E., Mota, L. M., Obaidi, I., Quigley, A., Xie, Y., Butler, M., 2020.  
798 Mammalian cell culture for production of recombinant proteins: A review of the critical

799 steps in their biomanufacturing. *Biotechnol Adv.* 43, 107552.  
800 <https://doi.org/10.1016/j.biotechadv.2020.107552>.

801 O'Leary, N. A., Wright, M. W., Brister, J. R., Ciufu, S., Haddad, D., McVeigh, R., Rajput, B., Robbertse,  
802 B., Smith-White, B., Ako-Adjei, D., Astashyn, A., Badretdin, A., Bao, Y., Blinkova, O., Brover, V.,  
803 Chetvernin, V., Choi, J., Cox, E., Ermolaeva, O., Farrell, C. M., Goldfarb, T., Gupta, T., Haft, D.,  
804 Hatcher, E., Hlavina, W., Joardar, V. S., Kodali, V. K., Li, W., Maglott, D., Masterson, P.,  
805 McGarvey, K. M., Murphy, M. R., O'Neill, K., Pujar, S., Rangwala, S. H., Rausch, D., Riddick, L.  
806 D., Schoch, C., Shkeda, A., Storz, S. S., Sun, H., Thibaud-Nissen, F., Tolstoy, I., Tully, R. E., Vatsan,  
807 A. R., Wallin, C., Webb, D., Wu, W., Landrum, M. J., Kimchi, A., Tatusova, T., DiCuccio, M., Kitts,  
808 P., Murphy, T. D., Pruitt, K. D., 2016. Reference sequence (RefSeq) database at NCBI: current  
809 status, taxonomic expansion, and functional annotation. *Nucleic Acids Res.* 44, D733-45.  
810 <https://doi.org/10.1093/nar/gkv1189>.

811 Orth, J. D., Thiele, I., Palsson, B. O., 2010. What is flux balance analysis? *Nat Biotechnol.* 28, 245-8.  
812 <https://doi.org/10.1038/nbt.1614>.

813 Process Systems Enterprise, gPROMS. [www.psenterprise.com/gproms](http://www.psenterprise.com/gproms). 1997-2020.

814 Rupp, O., MacDonald, M. L., Li, S., Dhiman, H., Polson, S., Griep, S., Heffner, K., Hernandez, I.,  
815 Brinkrolf, K., Jadhav, V., Samoudi, M., Hao, H., Kingham, B., Goesmann, A., Betenbaugh, M. J.,  
816 Lewis, N. E., Borth, N., Lee, K. H., 2018. A reference genome of the Chinese hamster based on  
817 a hybrid assembly strategy. *Biotechnol Bioeng.* 115, 2087-2100.  
818 <https://doi.org/10.1002/bit.26722>.

819 Sauer, P. W., Burky, J. E., Wesson, M. C., Sternard, H. D., Qu, L., 2000. A high-yielding, generic fed-  
820 batch cell culture process for production of recombinant antibodies. *Biotechnol Bioeng.* 67,  
821 585-97.

822 Schuetz, R., Kuepfer, L., Sauer, U., 2007. Systematic evaluation of objective functions for predicting  
823 intracellular fluxes in *Escherichia coli*. *Mol Syst Biol.* 3, 119.  
824 <https://doi.org/10.1038/msb4100162>.

- 825 Selvarasu, S., Ho, Y. S., Chong, W. P., Wong, N. S., Yusufi, F. N., Lee, Y. Y., Yap, M. G., Lee, D. Y., 2012.  
826 Combined in silico modeling and metabolomics analysis to characterize fed-batch CHO cell  
827 culture. *Biotechnol Bioeng.* 109, 1415-29. <https://doi.org/10.1002/bit.24445>.
- 828 Sheikh, K., Forster, J., Nielsen, L. K., 2005. Modeling hybridoma cell metabolism using a generic  
829 genome-scale metabolic model of *Mus musculus*. *Biotechnol Prog.* 21, 112-21.  
830 <https://doi.org/10.1021/bp0498138>.
- 831 Stockmann, H., Adamczyk, B., Hayes, J., Rudd, P. M., 2013. Automated, high-throughput IgG-  
832 antibody glycoprofiling platform. *Anal Chem.* 85, 8841-9.  
833 <https://doi.org/10.1021/ac402068r>.
- 834 Synoground, B. F., McGraw, C. E., Elliott, K. S., Leuze, C., Roth, J. R., Harcum, S. W., Sandoval, N. R.,  
835 2021. Transient ammonia stress on Chinese hamster ovary (CHO) cells yield alterations to  
836 alanine metabolism and IgG glycosylation profiles. *Biotechnol J.* 16, e2100098.  
837 <https://doi.org/10.1002/biot.202100098>.
- 838 Szeliöva, D., Ruckerbauer, D. E., Galleguillos, S. N., Petersen, L. B., Natter, K., Hanscho, M., Troyer,  
839 C., Causon, T., Schoeny, H., Christensen, H. B., Lee, D. Y., Lewis, N. E., Koellensperger, G., Hann,  
840 S., Nielsen, L. K., Borth, N., Zanghellini, J., 2020. What CHO is made of: Variations in the  
841 biomass composition of Chinese hamster ovary cell lines. *Metab Eng.*  
842 <https://doi.org/10.1016/j.ymben.2020.06.002>.
- 843 Wahrheit, J., Nicolae, A., Heinzle, E., 2014. Dynamics of growth and metabolism controlled by  
844 glutamine availability in Chinese hamster ovary cells. *Appl Microbiol Biotechnol.* 98, 1771-  
845 83. <https://doi.org/10.1007/s00253-013-5452-2>.
- 846 Xiang, J., Prasad, L., Delbaere, L. T., Jia, Z., 1999. Light-chain framework region residue Tyr71 of  
847 chimeric B72.3 antibody plays an important role in influencing the TAG72 antigen binding.  
848 *Protein Eng.* 12, 417-21.
- 849 Yang, S. J., Cho, E. H., Choi, M. M., Lee, H. J., Huh, J. W., Choi, S. Y., Cho, S. W., 2005. Critical role of  
850 the cysteine 323 residue in the catalytic activity of human glutamate dehydrogenase  
851 isozymes. *Mol Cells.* 19, 97-103.

852 Yeo, H. C., Hong, J., Lakshmanan, M., Lee, D. Y., 2020. Enzyme capacity-based genome scale  
853 modelling of CHO cells. *Metab Eng.* 60, 138-147.

854 <https://doi.org/10.1016/j.ymben.2020.04.005>.

855 Zamorano, F., Wouwer, A. V., Bastin, G., 2010. A detailed metabolic flux analysis of an  
856 underdetermined network of CHO cells. *J Biotechnol.* 150, 497-508.

857 <https://doi.org/10.1016/j.jbiotec.2010.09.944>.

858
