# Supplementary material for: CHOmpact: a reduced metabolic model of Chinese hamster ovary cells with enhanced interpretability
Source: bioRxiv or medRxiv preprint supplement (doi:10.1101/2021.07.19.452953), 2021-07-20
Supplement: Supplementary file [file media-2.pdf]

## Supplementary File

### CHOMPact: a reduced metabolic model of Chinese hamster ovary cells with enhanced interpretability

Ioscani Jiménez del Val<sup>1,\*</sup>, Sarantos Kyriakopoulos<sup>2,‡</sup>, Simone Albrecht<sup>3</sup>, Henning Stockmann<sup>3</sup>,  
Pauline M Rudd<sup>3,†</sup>, Karen M Polizzi<sup>4</sup> and Cleo Kontoravdi<sup>4</sup>

<sup>1</sup> School of Chemical & Bioprocess Engineering, University College Dublin D04 V1W8, Ireland

<sup>2</sup> MS&T, BioMarin Manufacturing Ireland, Cork P43 R298, Ireland

<sup>3</sup> NIBRT GlycoScience Group, National Institute for Bioprocessing Research and Training, Dublin A94 X099, Ireland

<sup>4</sup> Department of Chemical Engineering, Imperial College London SW7 2AZ, United Kingdom

\*Author to whom correspondence should be addressed.

e-mail: [ioscani.jimenezdelval@ucd.ie](mailto:ioscani.jimenezdelval@ucd.ie)

† Present address: Bioprocessing Technology Institute, Agency for Science, Technology and Research (A\*STAR) 138668, Singapore

‡ Present address: Process Development, Lonza Group AG, Wisp 3930, Switzerland

#### Aspartate-Malate Shuttle

The purpose of the Asp-Mal shuttle is to transfer reducing equivalents (electrons) from cytosolic NADH to mitochondrial NAD<sup>+</sup> (Borst, 2020; Zagari et al., 2013b). Because the mitochondrial membrane is impermeable to electrons, the following reactions are required for their transfer from cytosol to mitochondria:

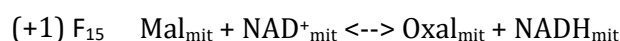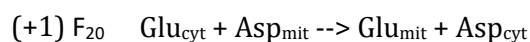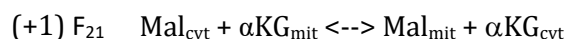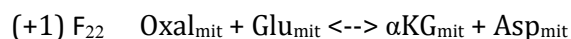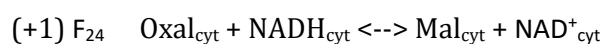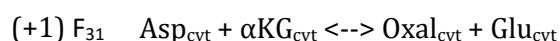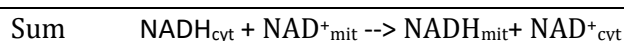

From the above, it can be seen that the Asp-Mal shuttle reactions yield no net production/consumption of Asp, Glu,  $\alpha$ KG, Oxal or Mal because, within this pathway, all participating components (except NADH<sub>cyt</sub>, NAD<sup>+</sup><sub>mit</sub>, NADH<sub>mit</sub>, and NAD<sup>+</sup><sub>cyt</sub>) are produced and consumed at equivalent rates – their fluxes within the shuttle cancel out. In conjunction, the sink for mitochondrial NADH<sub>mit</sub> is unconstrained: it is consumed to produce ATP via F<sub>19</sub> and the flux of ATP consumption towards unspecified reactions (F<sub>104</sub> – see Figure 1 in the manuscript) is computed through optimisation.

Overall, this means that as long as the balances for NADH<sub>cyt</sub>, NAD<sup>+</sup><sub>mit</sub>, NADH<sub>mit</sub>, and NAD<sup>+</sup><sub>cyt</sub> are satisfied, the fluxes for all reactions in the Asp-Mal shuttle can take any value and may lead to shuttle uptakes of glutamate that are unfeasibly high (e.g., having similar magnitude as glycolytic fluxes while glutamate uptake from the extracellular environment is an order of magnitude below that of glucose).

For this reason, we have constrained F<sub>20</sub>, the rate-limiting step of the Asp-Mal shuttle (LaNoue et al., 1974; LaNoue and Tischler, 1974), to never exceed the flux of glutamate internalised by the cells or produced through reactions independent of the Asp-Mal shuttle.

# Cell culture data

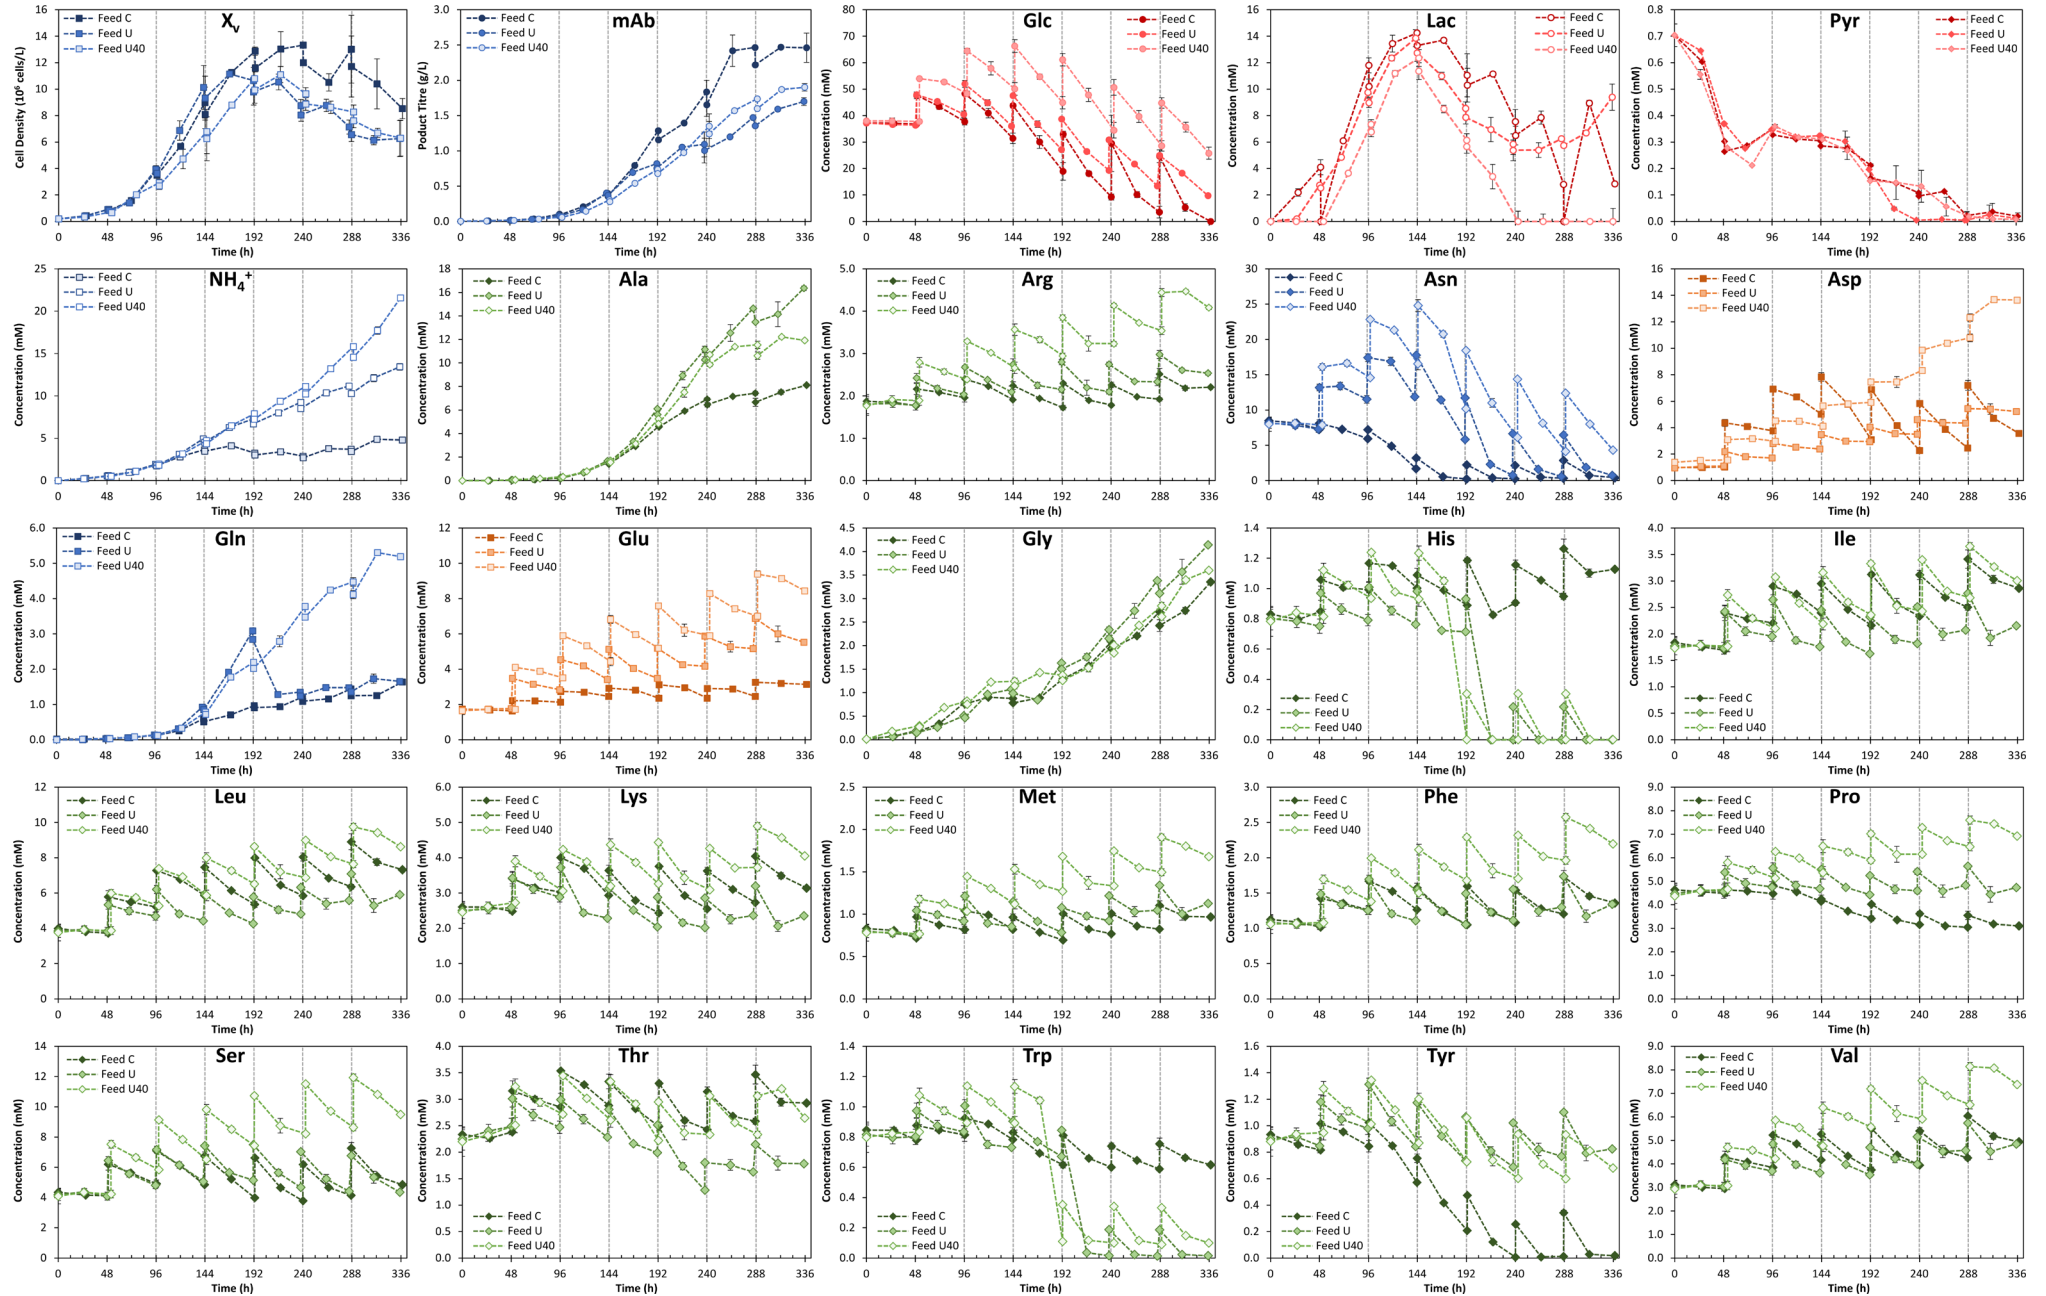

Supplementary Figure 1. Experimental data for three fed-batch experiments. The vertical grey dashed lines show the culture intervals considered for FBA calculations.

Feed C

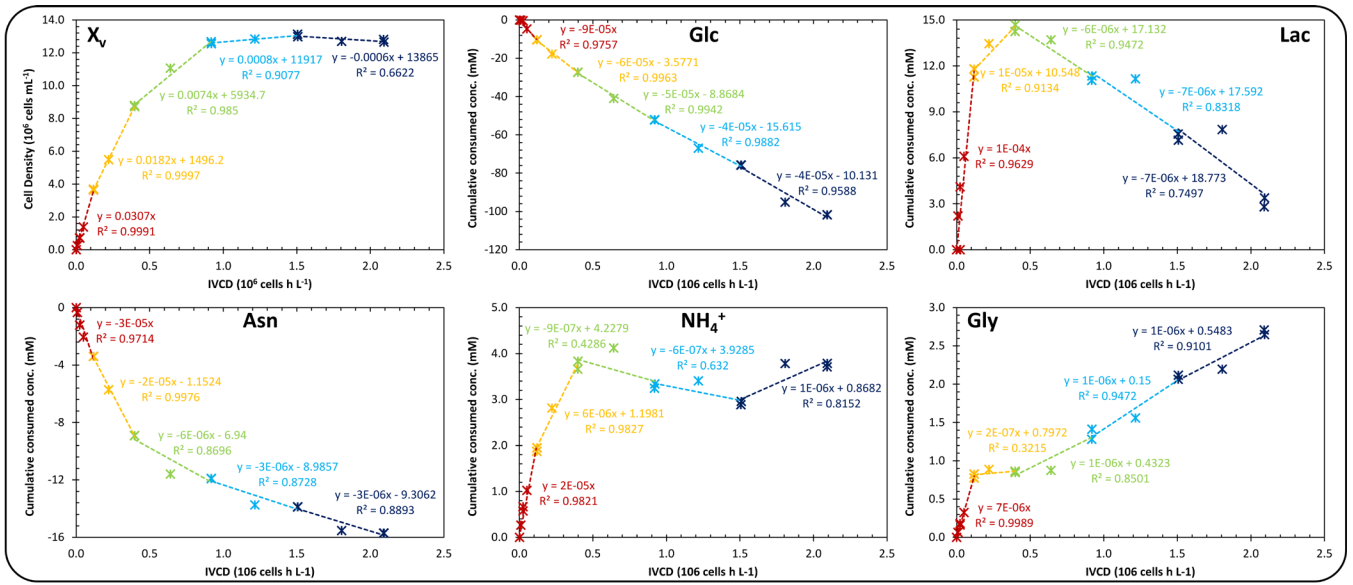

Feed U

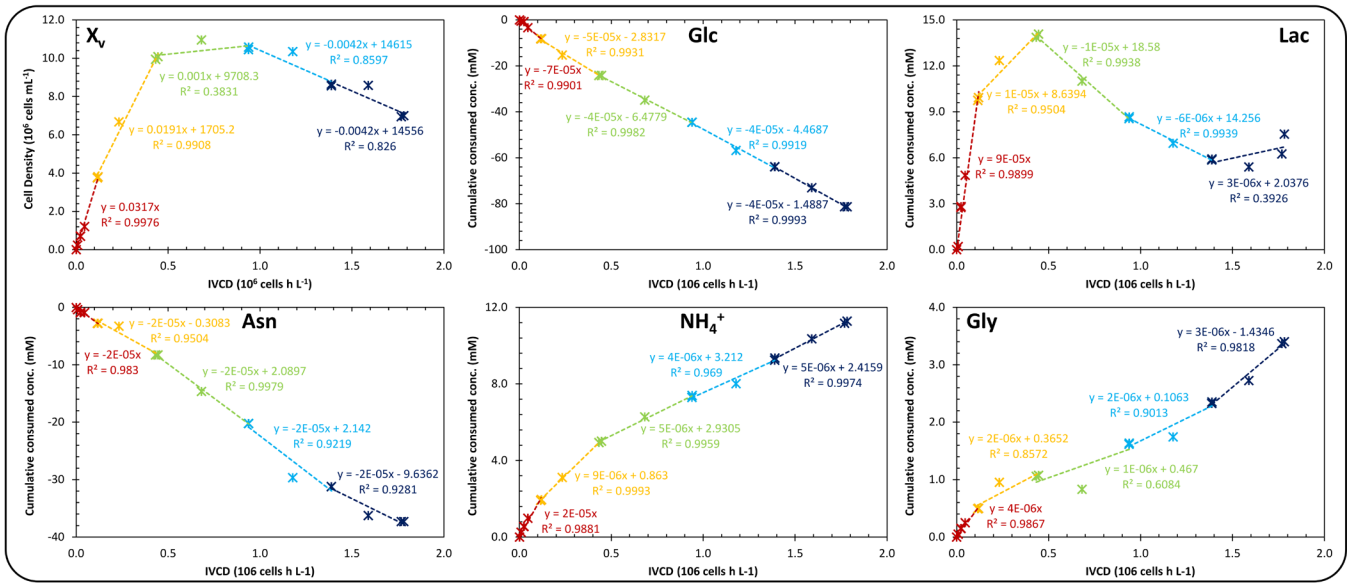

Feed U40

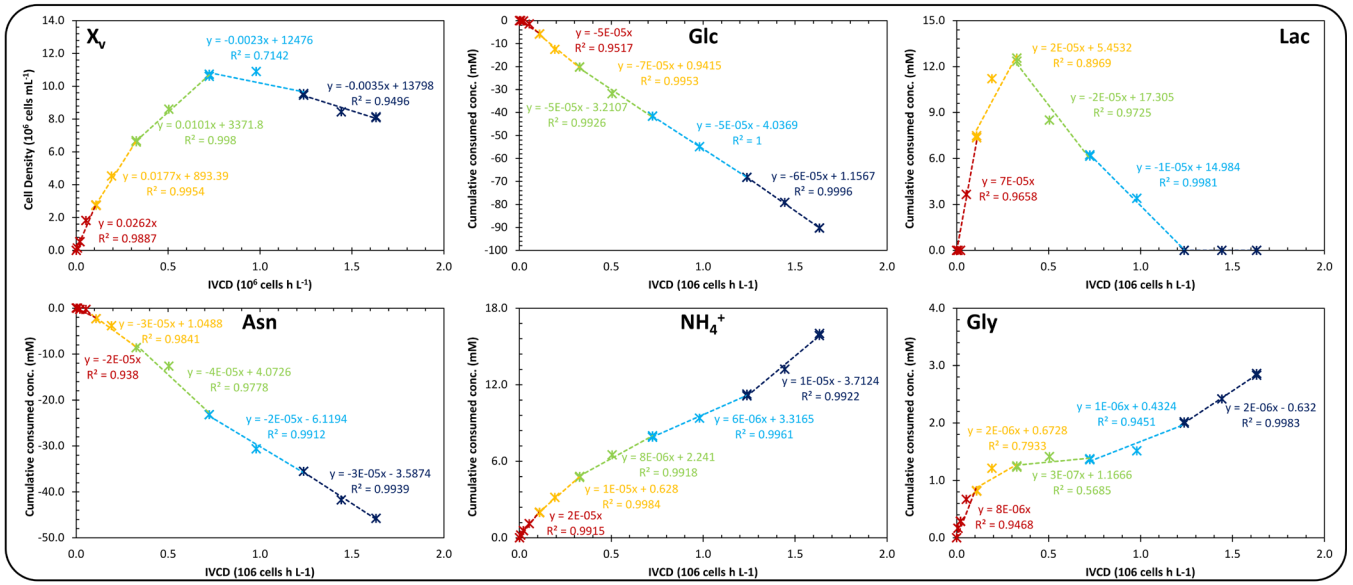

✖ Early Expon ✖ Mid Expon ✖ Late Expon ✖ Stationary ✖ Late Stat ✖ Death

Supplementary Figure 2. Intervals considered for flux analysis

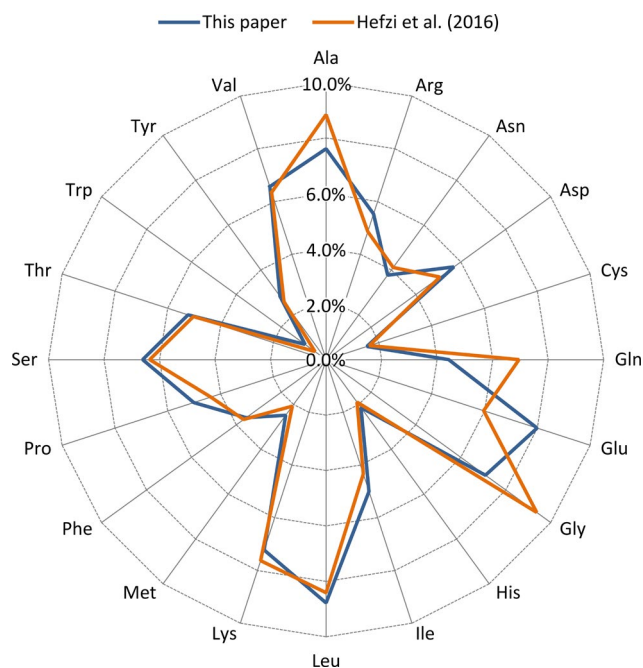

**Supplementary Figure 3. Comparison of the amino acid composition in HCPs.** The values considered in this paper are shown in blue and the ones assumed by Hefzi et al. (2016) are presented in orange. The composition is shown in units of mole of amino acid *i* per mole of host cell protein.

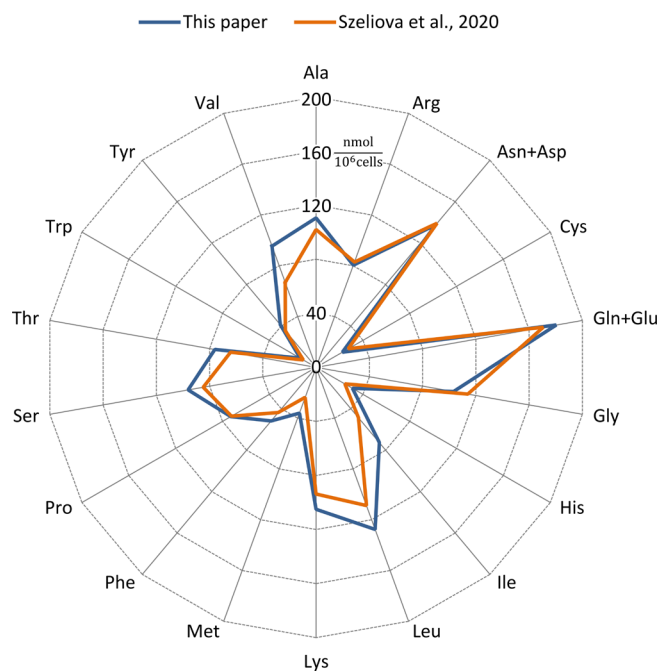

**Supplementary Figure 4. Comparison of the stoichiometric coefficients for amino acids in biomass.** The exponential growth stoichiometric coefficients of amino acids in biomass used in this work are compared with those determined by Szelióva et al. (2020). The latter correspond to the average value across ten CHO cell lines cultured under different nutrient conditions.

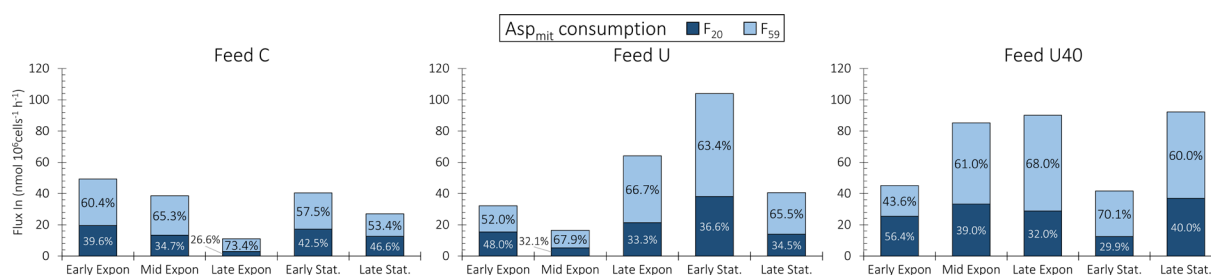

**Supplementary Figure 5. The rate-limiting step of the Asp/Mal shuttle (F<sub>20</sub>) and the sum of cell-specific uptake rates for Asn, Asp, Gln, and Glu for the three feed compositions (Feed C, U, and U40). Similarities between the profiles for F<sub>20</sub> and the sum of anaplerotic amino acid uptake rates are observed. The minimum values of F<sub>20</sub> corresponds to a shift from Glu cataplerosis to anaplerosis.**

## References

- Borst, P., 2020. The malate-aspartate shuttle (Borst cycle): How it started and developed into a major metabolic pathway. *IUBMB Life*. 72, 2241-2259. <https://doi.org/10.1002/iub.2367>.
- Hefzi, H., Ang, K. S., Hanscho, M., Bordbar, A., Ruckerbauer, D., Lakshmanan, M., Orellana, C. A., Baycin-Hizal, D., Huang, Y., Ley, D., Martinez, V. S., Kyriakopoulos, S., Jimenez, N. E., Zielinski, D. C., Quek, L. E., Wulff, T., Arnsdorf, J., Li, S., Lee, J. S., Paglia, G., Loira, N., Spahn, P. N., Pedersen, L. E., Gutierrez, J. M., King, Z. A., Lund, A. M., Nagarajan, H., Thomas, A., Abdel-Haleem, A. M., Zanghellini, J., Kildegaard, H. F., Voldborg, B. G., Gerdtzen, Z. P., Betenbaugh, M. J., Palsson, B. O., Andersen, M. R., Nielsen, L. K., Borth, N., Lee, D. Y., Lewis, N. E., 2016. A Consensus Genome-scale Reconstruction of Chinese Hamster Ovary Cell Metabolism. *Cell Syst*. 3, 434-443 e8. <https://doi.org/10.1016/j.cels.2016.10.020>.
- LaNoue, K. F., Meijer, A. J., Brouwer, A., 1974. Evidence for electrogenic aspartate transport in rat liver mitochondria. *Arch Biochem Biophys*. 161, 544-50.
- LaNoue, K. F., Tischler, M. E., 1974. Electrogenic characteristics of the mitochondrial glutamate-aspartate antiporter. *J Biol Chem*. 249, 7522-8.
- Mulukutla, B. C., Gramer, M., Hu, W. S., 2012. On metabolic shift to lactate consumption in fed-batch culture of mammalian cells. *Metab Eng*. 14, 138-49. <https://doi.org/10.1016/j.ymben.2011.12.006>.
- Szeliiova, D., Ruckerbauer, D. E., Galleguillos, S. N., Petersen, L. B., Natter, K., Hanscho, M., Troyer, C., Causon, T., Schoeny, H., Christensen, H. B., Lee, D. Y., Lewis, N. E., Koellensperger, G., Hann, S., Nielsen, L. K., Borth, N., Zanghellini, J., 2020. What CHO is made of: Variations in the biomass composition of Chinese hamster ovary cell lines. *Metab Eng*. <https://doi.org/10.1016/j.ymben.2020.06.002>.
- Zagari, F., Jordan, M., Stettler, M., Broly, H., Wurm, F. M., 2013a. Lactate metabolism shift in CHO cell culture: the role of mitochondrial oxidative activity. *N Biotechnol*. 30, 238-45. <https://doi.org/10.1016/j.nbt.2012.05.021>.
- Zagari, F., Stettler, M., Baldi, L., Broly, H., Wurm, F. M., Jordan, M., 2013b. High expression of the aspartate-glutamate carrier Aralar1 favors lactate consumption in CHO cell culture. *Pharmaceutical Bioprocessing*. 1, 19-27. <https://doi.org/doi:10.4155/pbp.13.5>.
